# Supplementary material for: Discovery of alternative stable states in a synthetic human gut microbial community
Source: bioRxiv preprint, doi:10.1101/2024.11.28.625814, version 1 (2024-11-28)
Supplement: Supplementary Table S2 [file 625814_file05.xlsx]

## Sheet: ambrAll
Vessel	Condition	Description	Label	Time (h)	Time in condition (h)	Pyruvate (mM)	Glucose (mM)	Trehalose (mM)	Acetate (mM)	Lactate (mM)	Succinate (mM)	Formate (mM)	Butyrate (mM)	Blautia hydrogenotrophica (10^5 cells/uL)	Bacteroides thetaiotaomicron (10^5 cells/uL)	Roseburia intestinalis (10^5 cells/uL)
A6_C2_V7	control	control conditions	E1_C1	0	0	10.3304	10.0203	0.707072	2.50746	0.789426	0.661755	0.993359	0.22715	0.100359	0.0534456	0.017123
A6_C2_V7	control	control conditions	E1_C2	8	8	8.34879	8.68949	0.553845	6.15997	0.841663	0.991896	0.81965	0.299873	2.36013	1.05093	0.0204621
A6_C2_V7	control	control conditions	E1_C3	16	16	0.0993924	0.777375	0.1621	15.5486	1.02118	5.58555	0.85642	1.76088	2.24984	9.17711	0.410866
A6_C2_V7	control	control conditions	E1_C4	24	24	0	0.481714	0.252398	12.7205	1.61116	4.84595	0.689269	4.47354	2.11427	5.88945	0.960802
A6_C2_V7	control	control conditions	E1_C5	32	32	0	0.198472	0.307071	9.11193	2.12377	3.60666	0.741422	6.60167	0.860357	4.349	0.557833
A6_C2_V7	control	control conditions	E1_C6	40	40	0	0.07739	0.361814	6.70405	2.28244	2.89523	0.850027	8.77716	0.819151	4.14373	1.1499
A6_C2_V7	control	control conditions	E1_C7	48	48	0	0.0852481	0.448288	5.70004	2.50636	2.91212	1.03319	11.6029	0.610574	5.41924	2.98463
A6_C2_V7	control	control conditions	E1_C8	56	56	0	0.0723846	0.451883	5.07401	2.40524	2.55552	1.05708	11.6376	0.612918	0.000329897	0.000412371
A6_C2_V7	control	control conditions	E1_C9	64	64	0	0.0595211	0.455477	4.44797	2.30412	2.19892	1.08097	11.6723	0.615261	5.84871	4.80087
A6_C2_V7	control	control conditions	E1_C10	72	72	0	0.0647817	0.480411	5.01238	2.19803	2.22621	0.966194	12.8425	0.37113	6.46041	4.67292
A6_C2_V7	control	control conditions	E1_C11	80	80	0	0.0584591	0.139878	6.25196	1.7033	1.99135	0.934059	12.3787	2.36626	5.79448	4.6072
A6_C2_V7	control	control conditions	E1_C12	88	88	0	0.0539182	0	8.27554	1.27519	1.85441	1.06809	12.9618	1.74321	2.71592	2.36837
A6_C2_V7	perturbation	ongoing pH perturbation	E1_P1	96	8	0	0.0595139	0	9.50143	1.06142	2.01194	1.18375	15.2018	1.57549	5.86761	5.64056
A6_C2_V7	perturbation	ongoing pH perturbation	E1_P2	104	16	0	0.055826	0	7.54741	0.747116	1.56942	0.961138	13.9202	1.2711	3.70308	3.76702
A6_C2_V7	perturbation	post pH perturbation	E1_P3	112	24	0.433061	0.162788	0.0837618	6.85891	0.637448	1.31402	0.76667	12.7879	1.47822	2.46638	3.18793
A6_C2_V7	perturbation	post pH perturbation	E1_P4	120	8	2.63035	1.9103	0.161498	6.21861	0.784014	1.41135	0.758934	9.97013	1.05035	2.44822	2.19269
A6_C2_V7	perturbation	post pH perturbation	E1_P5	128	16	4.44009	3.6811	0.248687	5.12711	0.612695	1.28548	0.801641	7.4847	0.587482	2.12278	1.5134
A6_C2_V7	perturbation	post pH perturbation	E1_P6	136	24	5.80995	4.81149	0.312082	4.4254	0.575747	1.20519	0.834341	5.76476	0.492892	0.956868	0.621044
A6_C2_V7	perturbation	post pH perturbation	E1_P7	144	32	7.90459	6.58013	0.407552	4.49609	0.614898	1.3739	1.01227	5.01732	0.583354	1.00924	1.20787
A6_C2_V7	perturbation	ongoing feed perturbation	E1_P8	152	2	7.08857	5.90827	0.371158	4.17016	0.51382	1.38414	0.911936	4.54564	0.474586	0.934459	0.827846
A6_C2_V7	perturbation	ongoing feed perturbation	E1_P9	160	10	7.05141	5.85612	0.368475	4.31538	0.516546	1.52966	0.916844	4.59387	0.426285	1.27376	0.762005
A6_C2_V7	perturbation	ongoing feed perturbation	E1_P10	168	18	9.97391	8.44969	0.494711	3.28892	0.611179	1.13387	1.09123	2.05879	0.189029	0.552358	0.385832
A6_C2_V7	perturbation	post pH/feed perturbation	E1_P11	176	26	9.82397	8.26619	0.482527	2.90698	0.548143	0.980874	1.0491	1.46786	0.155958	0.284762	0.211687
A6_C2_V7	perturbation	post pH/feed perturbation	E1_P12	184	34	9.74541	8.07363	0.480058	3.06779	0.581498	1.03586	1.23401	0.0014885	0.0467484	0.860706	0.06315
A6_C2_V7	perturbation	post pH/feed perturbation	E1_P13	192	42	6.71875	5.30832	0.562127	8.38141	0.943224	4.62111	2.86671	0.872302	0.0312349	9.586	0.0268967
A6_C2_V7	perturbation	post pH/feed perturbation	E1_P14	200	50	1.58326	1.29554	0.557079	11.0587	1.43402	7.97009	2.25021	0.576741	0.0177703	6.40955	0.0245164
A6_C2_V7	perturbation	post pH/feed perturbation	E1_P15	208	58	0.994784	1.10936	0.54155	11.2493	1.42342	8.80719	1.91905	0.446105	0.0152314	5.19751	0.0158468
A6_C2_V7	perturbation	post pH/feed perturbation	E1_P16	216	66	1.52006	1.83661	0.560552	11.247	1.59158	9.14979	1.93234	0.347098	0.0199167	3.96413	0.0216595
A6_C2_V7	perturbation	post pH/feed perturbation	E1_P17	224	74	2.17181	2.44875	0.528285	9.89818	1.86709	7.84646	1.47493	0.374721	0.00999501	2.10424	0.0146255
A6_C2_V7	perturbation	post pH/feed perturbation	E1_P18	232	82	3.17716	3.29443	0.514357	8.70254	2.02032	6.7682	1.37511	0.243485	0.0127467	2.0997	0.0210928
A6_C2_V7	perturbation	post pH/feed perturbation	E1_P19	240	90	4.81663	4.59572	0.566648	8.46837	2.72142	6.40989	1.40048	0.200452	0.00663044	2.15201	0.0110027
A6_C2_V7	perturbation	post pH/feed perturbation	E1_P20	248	98	5.44308	4.87409	0.509166	7.17713	2.37217	5.1275	1.31721	0.17196	0.0072768	1.97691	0.00986411
A6_C2_V7	perturbation	post pH/feed perturbation	E1_P21	256	106	5.17298	4.02679	0.498713	7.5687	1.83207	5.54592	1.49175	0.128478	0.00523147	3.7335	0.00731065
A6_C2_V7	perturbation	post pH/feed perturbation	E1_P22	264	114	3.7343	2.55075	0.578559	10.8159	2.35538	8.57817	1.741	0.114493	0.0058589	3.7702	0.00374319
A6_C2_V7	perturbation	post pH/feed perturbation	E1_P23	272	122	1.61892	1.19246	0.387241	7.36196	1.47015	6.13867	1.10765	0.130702	0	2.69166	0.00113586
A6_C2_V7	perturbation	post pH/feed perturbation	E1_P24	280	130	2.43674	1.64337	0.513866	10.1731	2.78861	8.74745	1.55044	0.0817901	0	3.22495	0.00174906
A6_C2_V7	perturbation	post pH/feed perturbation	E1_P25	288	138	3.10114	1.90495	0.565405	11.3395	3.40095	9.73517	1.85275	0.07796	0	5.48586	0.00102529
A6_C2_V7	perturbation	post pH/feed perturbation	E1_P26	296	146	3.06441	1.71541	0.512756	10.3881	3.33894	8.68702	1.66922	0.0596146	0.00252056	4.99284	0.0013443
A6_C2_V7	perturbation	post pH/feed perturbation	E1_P27	308	158	2.26044	0.998809	0.51126	11.2248	3.71078	9.39286	1.65229	0.0662137	0	7.02877	0.00142772
A6_C2_V8	control	control conditions	E1_C1	0	0	10.0918	9.88088	0.69342	2.43603	0.773684	0.637186	0.958032	0.226029	0.0432982	0.0474084	0.0189369
A6_C2_V8	control	control conditions	E1_C2	8	8	7.99346	8.1562	0.484888	7.17467	0.821255	1.17494	0.831115	0.35828	2.83871	1.77425	0.0869005
A6_C2_V8	control	control conditions	E1_C3	16	16	0	0.274729	0.107986	14.8224	0.750508	4.78477	0.667249	2.78338	4.52689	8.53658	0.717219
A6_C2_V8	control	control conditions	E1_C4	24	24	0	0.0703632	0.183442	9.94208	0.917366	3.50391	0.706591	7.40852	2.25169	10.2291	2.71718
A6_C2_V8	control	control conditions	E1_C5	32	32	0	0.06262	0.238143	5.47405	0.9254	2.84289	0.663864	9.83476	1.13479	4.90836	2.44312
A6_C2_V8	control	control conditions	E1_C6	40	40	0	0.0615482	0.294068	4.34047	1.08094	2.61316	0.724103	11.6933	0.73146	4.26941	1.5492
A6_C2_V8	control	control conditions	E1_C7	48	48	0	0.0671154	0.223854	4.99966	1.13397	2.77857	1.03739	12.9208	2.24066	11.548	5.63361
A6_C2_V8	control	control conditions	E1_C8	56	56	0	0.0621327	0	6.52206	0.813383	2.37594	0.820081	12.7817	3.35847	6.53148	4.14905
A6_C2_V8	control	control conditions	E1_C9	64	64	0	0.0646969	0	7.45448	0.638014	2.19531	0.958437	13.8267	3.44329	9.30618	5.51049
A6_C2_V8	control	control conditions	E1_C10	72	72	0	0.0653384	0	8.81444	0.541802	2.31593	1.43433	14.978	3.05744	10.8935	5.57201
A6_C2_V8	control	control conditions	E1_C11	80	80	0	0.0620121	0	8.42318	0.407547	2.01588	1.59131	14.7342	2.31279	8.16993	4.97974
A6_C2_V8	control	control conditions	E1_C12	88	88	0	0.0610853	0.0981988	6.05132	0.338102	1.93668	1.47084	15.4047	0.969949	8.47607	5.62593
A6_C2_V8	perturbation	ongoing pH perturbation	E1_P1	96	8	0	0.0637721	0.215379	5.09558	0.31282	2.20964	1.5936	16.4422	0.699848	9.87212	7.53637
A6_C2_V8	perturbation	ongoing pH perturbation	E1_P2	104	16	0	0.0605929	0.275977	3.72471	0.26184	1.81963	1.23745	14.4971	0.380272	6.70382	4.46487
A6_C2_V8	perturbation	post pH perturbation	E1_P3	112	24	0	0.0593168	0.332586	3.57135	0.255748	1.46231	1.3046	13.8326	0.239541	3.13182	3.04802
A6_C2_V8	perturbation	post pH perturbation	E1_P4	120	8	0.92112	0.323191	0.386865	3.93301	0.326393	1.33786	0.872038	11.7693	0.335938	4.32456	4.3834
A6_C2_V8	perturbation	post pH perturbation	E1_P5	128	16	2.60231	1.52804	0.412398	3.90099	1.09675	1.4895	0.807559	8.92506	0.232565	3.75325	2.72453
A6_C2_V8	perturbation	post pH perturbation	E1_P6	136	24	4.2289	2.88911	0.44307	3.83892	1.4534	1.56499	0.844839	7.01771	0.109884	2.79492	2.03319
A6_C2_V8	perturbation	post pH perturbation	E1_P7	144	32	5.96602	4.42416	0.500914	4.06681	1.94409	1.74839	0.987369	5.72896	0.0743856	1.60829	1.31505
A6_C2_V8	perturbation	ongoing feed perturbation	E1_P8	152	2	5.2638	3.84662	0.466272	4.00988	2.01878	1.8387	0.905275	5.33943	0.123647	1.72313	1.93037
A6_C2_V8	perturbation	ongoing feed perturbation	E1_P9	160	10	5.11413	3.666	0.468498	4.28651	2.40071	2.08402	0.91736	5.47355	0.147812	2.14002	2.02796
A6_C2_V8	perturbation	ongoing feed perturbation	E1_P10	168	18	8.85375	7.17246	0.524528	3.33406	1.74188	1.34722	1.06978	2.32895	0.028861	0.985903	0.46819
A6_C2_V8	perturbation	post pH/feed perturbation	E1_P11	176	26	8.11699	6.13968	0.507314	4.43777	1.20892	2.14861	1.54434	1.61999	0.0203362	5.64131	0.275106
A6_C2_V8	perturbation	post pH/feed perturbation	E1_P12	184	34	2.99871	1.56985	0.557992	9.47419	2.95826	6.62155	1.89278	1.23625	0.0118113	10.2967	0.0820231
A6_C2_V8	perturbation	post pH/feed perturbation	E1_P13	192	42	0.88978	0.733996	0.596288	12.0416	3.18491	9.49133	1.7713	0.944138	0.00515689	7.22975	0.0426303
A6_C2_V8	perturbation	post pH/feed perturbation	E1_P14	200	50	0.867284	0.688268	0.5502	11.317	2.07546	9.39005	1.42231	0.666817	0.00614571	6.32671	0.0412275
A6_C2_V8	perturbation	post pH/feed perturbation	E1_P15	208	58	1.457	1.12576	0.550243	10.9082	2.30128	9.12642	1.32278	0.551178	0.0240777	4.66193	0.0515664
A6_C2_V8	perturbation	post pH/feed perturbation	E1_P16	216	66	2.3705	2.06676	0.559729	10.2835	3.15187	8.57115	1.27157	0.430045	0.00349703	2.98856	0.0240712
A6_C2_V8	perturbation	post pH/feed perturbation	E1_P17	224	74	2.66775	2.86127	0.523009	9.07556	3.49006	7.18483	1.19109	0.360032	0.00211931	2.63589	0.0362932
A6_C2_V8	perturbation	post pH/feed perturbation	E1_P18	232	82	1.7487	3.57691	0.502198	8.67872	4.79331	6.10367	1.1758	0.347749	0.00122521	1.36666	0.0151109
A6_C2_V8	perturbation	post pH/feed perturbation	E1_P19	240	90	0.385688	4.33284	0.524685	9.19494	7.18422	5.52108	1.25845	0.399571	0.00257074	1.64562	0.0286114
A6_C2_V8	perturbation	post pH/feed perturbation	E1_P20	248	98	0.253014	3.94195	0.495416	8.46516	7.56119	4.8553	1.28717	0.551649	0	2.46981	0.00708616
A6_C2_V8	perturbation	post pH/feed perturbation	E1_P21	256	106	0.534825	2.34153	0.485304	8.76876	7.36069	5.9888	1.28363	0.679149	0.00159802	4.38423	0.00790133
A6_C2_V8	perturbation	post pH/feed perturbation	E1_P22	264	114	0.954935	1.55595	0.541016	10.5974	7.46935	8.35264	1.44717	0.663188	0	4.13704	0.00458029
A6_C2_V8	perturbation	post pH/feed perturbation	E1_P23	272	122	0.990594	0.974206	0.494487	10.1588	5.94732	8.77382	1.44897	0.499738	0	3.99302	0.00141268
A6_C2_V8	perturbation	post pH/feed perturbation	E1_P24	280	130	1.14957	0.808362	0.444567	9.27204	4.72935	8.04323	1.33297	0.39866	0	3.55054	0.00055834
A6_C2_V8	perturbation	post pH/feed perturbation	E1_P25	288	138	1.75375	1.0466	0.533179	11.3925	5.54101	9.89773	1.71682	0.359799	0	5.43839	0.00208876
A6_C2_V8	perturbation	post pH/feed perturbation	E1_P26	296	146	1.95232	1.03166	0.494188	10.8116	4.87799	9.15611	1.62959	0.262077	0	5.94202	0.00196808
A6_C2_V8	perturbation	post pH/feed perturbation	E1_P27	308	158	1.27527	0.560434	0.501442	11.8436	5.25233	9.86072	1.63667	0.248798	0	7.92481	0.00170246
A6_C2_V9	control	control conditions	E1_C1	0	0	10.1734	9.87013	0.696449	2.51052	0.793571	0.646953	0.969601	0.240149	0.114058	0.0402467	0.0075995
A6_C2_V9	control	control conditions	E1_C2	8	8	7.95822	8.25366	0.48828	7.33803	0.857475	1.21718	0.772707	0.358668	3.05643	1.79203	0.0889678
A6_C2_V9	control	control conditions	E1_C3	16	16	0	0.288465	0.0949645	14.7279	0.768484	4.81356	0.669044	2.98486	3.27212	8.58567	0.723139
A6_C2_V9	control	control conditions	E1_C4	24	24	0	0.073767	0.169541	9.74672	0.933141	3.70396	0.716483	7.92086	1.89351	7.32991	1.88738
A6_C2_V9	control	control conditions	E1_C5	32	32	0	0.0653591	0.22534	5.43914	1.02109	2.97261	0.734737	10.3613	1.34506	7.63492	2.57111
A6_C2_V9	control	control conditions	E1_C6	40	40	0	0.0602582	0.272181	4.32857	1.22064	2.74114	0.906414	11.7554	1.19749	7.66148	2.93411
A6_C2_V9	control	control conditions	E1_C7	48	48	0	0.0703875	0.163049	5.32909	1.14697	2.81603	1.01422	13.4051	2.12493	10.4161	5.15811
A6_C2_V9	control	control conditions	E1_C8	56	56	0	0.0612141	0	6.65572	0.818051	2.34982	0.789994	13.0345	3.40105	9.04615	4.57703
A6_C2_V9	control	control conditions	E1_C9	64	64	0	0.0604427	0	7.43705	0.634214	2.13093	1.33081	13.8971	2.61231	8.41492	4.76554
A6_C2_V9	control	control conditions	E1_C10	72	72	0	0.0426034	0	4.76151	0.300748	1.25214	0.691592	8.53289	2.52891	7.3703	6.36641
A6_C2_V9	control	control conditions	E1_C11	80	80	0	0.0640446	0	8.31544	0.384618	1.92711	1.2661	15.0604	2.46901	7.50747	4.99897
A6_C2_V9	control	control conditions	E1_C12	88	88	0	0.0594246	0.1211	6.29385	0.357125	1.79489	1.40605	15.3367	1.14288	8.01596	5.32747
A6_C2_V9	perturbation	ongoing pH perturbation	E1_P1	96	8	0	0.0637056	0.18914	5.21708	0.349627	2.03723	1.55293	16.7189	0.763607	8.68181	6.97683
A6_C2_V9	perturbation	ongoing pH perturbation	E1_P2	104	16	0	0.062735	0.259719	3.82937	0.264125	1.68487	1.38265	14.803	0.542642	6.29766	5.82285
A6_C2_V9	perturbation	post pH perturbation	E1_P3	112	24	0	0.0593409	0.316935	3.71944	0.233817	1.31252	1.16243	13.5494	0.318348	3.55079	5.70129
A6_C2_V9	perturbation	post pH perturbation	E1_P4	120	8	1.3932	0.608835	0.387944	4.14569	0.435716	1.37254	0.816929	11.6887	0.328869	2.82285	4.54257
A6_C2_V9	perturbation	post pH perturbation	E1_P5	128	16	3.35337	2.19208	0.408599	3.79664	0.919757	1.42581	0.805981	8.63758	0.219542	2.0835	2.71924
A6_C2_V9	perturbation	post pH perturbation	E1_P6	136	24	4.93476	3.52817	0.434929	3.51888	0.879067	1.23718	0.850531	6.64249	0.0814621	2.44829	1.96195
A6_C2_V9	perturbation	post pH perturbation	E1_P7	144	32	6.77469	5.13596	0.499761	3.78621	1.54509	1.64009	1.01746	5.56186	0.16614	1.55424	1.64894
A6_C2_V9	perturbation	ongoing feed perturbation	E1_P8	152	2	4.85356	4.55326	0.461263	4.25423	2.52913	1.71707	1.03219	5.13353	0.11282	1.31135	1.10969
A6_C2_V9	perturbation	ongoing feed perturbation	E1_P9	160	10	3.39617	4.44058	0.458213	5.00612	3.6186	1.80809	1.2239	5.24558	0.0825369	1.27784	0.890976
A6_C2_V9	perturbation	ongoing feed perturbation	E1_P10	168	18	7.43488	7.85473	0.532908	4.14655	2.99154	1.2501	1.43127	2.3222	0.0205158	0.481501	0.255096
A6_C2_V9	perturbation	post pH/feed perturbation	E1_P11	176	26	6.99792	7.57042	0.507996	4.16792	3.09484	1.24124	1.3327	1.60734	0.0155895	0.872952	0.166849
A6_C2_V9	perturbation	post pH/feed perturbation	E1_P12	184	34	2.31342	2.21236	0.519517	9.23498	4.0386	5.98567	2.14366	1.20095	0.0116621	10.0907	0.0691949
A6_C2_V9	perturbation	post pH/feed perturbation	E1_P13	192	42	0.596434	1.10702	0.584374	12.216	4.67417	8.85509	2.06597	1.04094	0.00735147	7.0609	0.0424241
A6_C2_V9	perturbation	post pH/feed perturbation	E1_P14	200	50	0.66487	1.22844	0.534236	11.224	3.68198	8.54658	1.64691	0.816432	0.00498719	5.08369	0.0337675
A6_C2_V9	perturbation	post pH/feed perturbation	E1_P15	208	58	0.962229	1.75106	0.529464	10.7176	3.8761	8.461	1.50683	0.784568	0.00247319	2.6893	0.0145506
A6_C2_V9	perturbation	post pH/feed perturbation	E1_P16	216	66	1.25226	2.60195	0.531754	10.2869	4.56152	8.30561	1.48721	0.756906	0.0676132	2.23124	0.249056
A6_C2_V9	perturbation	post pH/feed perturbation	E1_P17	224	74	1.57289	3.15036	0.49977	8.94259	4.62789	7.0641	1.39359	0.814183	0.00228608	2.08963	0.0177383
A6_C2_V9	perturbation	post pH/feed perturbation	E1_P18	232	82	2.45712	4.07224	0.494332	7.93598	4.51981	6.00798	1.48321	0.937936	0	1.52387	0.0123225
A6_C2_V9	perturbation	post pH/feed perturbation	E1_P19	240	90	3.60877	4.92873	0.515023	7.6569	4.49501	5.43085	1.52211	0.82848	0.00187133	2.23073	0.0115844
A6_C2_V9	perturbation	post pH/feed perturbation	E1_P20	248	98	3.13252	2.95808	0.502537	8.6044	4.18092	6.82266	1.633	0.612887	0	5.53643	0.0087064
A6_C2_V9	perturbation	post pH/feed perturbation	E1_P21	256	106	1.53241	1.15656	0.495345	10.0008	4.28883	8.74954	1.51817	0.486927	0	5.25426	0.00698169
A6_C2_V9	perturbation	post pH/feed perturbation	E1_P22	264	114	1.32332	0.975836	0.557822	12.1506	4.35061	10.9351	1.80391	0.412973	0	4.45537	0.00123563
A6_C2_V9	perturbation	post pH/feed perturbation	E1_P23	272	122	1.30728	0.836276	0.511307	11.3178	3.85537	10.32	1.72516	0.304078	0	4.96261	0.00235538
A6_C2_V9	perturbation	post pH/feed perturbation	E1_P24	280	130	1.68776	0.955551	0.506579	11.093	3.93025	9.98181	1.74927	0.272421	0	4.38569	0.00400371
A6_C2_V9	perturbation	post pH/feed perturbation	E1_P25	288	138	2.10305	1.08136	0.544709	11.7835	4.51041	10.5603	1.95445	0.24241	0	5.12668	0.00203796
A6_C2_V9	perturbation	post pH/feed perturbation	E1_P26	296	146	2.22386	1.03471	0.512009	11.2247	4.41436	9.75702	1.82249	0.172296	0	5.89851	0.00109589
A6_C2_V9	perturbation	post pH/feed perturbation	E1_P27	308	158	1.41735	0.559476	0.504937	12	4.74672	10.1744	1.7841	0.163478	0	7.49386	0.00164802
A6_C2_V10	control	control conditions	E1_C1	0	0	10.1408	9.86029	0.693447	2.49244	0.79768	0.660326	0.959753	0.233825	0.076084	0.0315498	0.00490869
A6_C2_V10	control	control conditions	E1_C2	8	8	7.97179	8.06944	0.470762	7.20417	0.863325	1.24725	0.830878	0.366427	2.96546	1.92795	0.102089
A6_C2_V10	control	control conditions	E1_C3	16	16	0.0765239	0.271157	0.122934	15.0393	0.781458	4.82265	0.643625	2.44915	3.61887	9.46223	0.616585
A6_C2_V10	control	control conditions	E1_C4	24	24	0	0.0730284	0.196031	10.3873	0.927096	3.46415	0.72263	7.04954	2.15349	9.429	2.38259
A6_C2_V10	control	control conditions	E1_C5	32	32	0	0.0652589	0.254903	5.88834	0.88082	2.81881	0.665232	9.77933	1.19929	8.95511	3.07122
A6_C2_V10	control	control conditions	E1_C6	40	40	0	0.0611956	0.295649	4.39194	0.884916	2.55511	0.801092	11.3548	1.39337	9.13868	5.71816
A6_C2_V10	control	control conditions	E1_C7	48	48	0	0.0673186	0.161715	5.26301	0.91827	2.73718	0.906846	12.9746	2.17567	13.5015	4.5751
A6_C2_V10	control	control conditions	E1_C8	56	56	0	0.061849	0	6.5849	0.648682	2.31731	0.966173	12.7725	4.5189	10.4462	4.74559
A6_C2_V10	control	control conditions	E1_C9	64	64	0	0.0596917	0	7.35449	0.526294	2.18266	1.28204	13.5851	5.61364	9.02949	5.95618
A6_C2_V10	control	control conditions	E1_C10	72	72	0	0.0625872	0	9.26246	0.459327	2.34033	1.48153	15.2098	4.13557	9.49041	5.20438
A6_C2_V10	control	control conditions	E1_C11	80	80	0	0.0599319	0	8.01202	0.360379	2.02842	1.52744	14.7856	2.48627	8.07014	6.71641
A6_C2_V10	control	control conditions	E1_C12	88	88	0	0.0623916	0.0854387	5.73711	0.306304	1.96382	1.40293	15.3889	1.28044	9.84801	6.88951
A6_C2_V10	perturbation	ongoing pH perturbation	E1_P1	96	8	0	0.0609849	0.0327446	5.75112	0.245928	2.20486	1.3255	16.4658	1.5894	14.4944	8.78936
A6_C2_V10	perturbation	ongoing pH perturbation	E1_P2	104	16	0	0.0592977	0	5.95936	0.181768	1.92249	1.00612	15.2774	3.09532	8.92025	5.19172
A6_C2_V10	perturbation	post pH perturbation	E1_P3	112	24	0	0.0612115	0.0594425	4.73393	0.185653	1.66348	0.926524	15.52	1.89598	6.04405	6.10556
A6_C2_V10	perturbation	post pH perturbation	E1_P4	120	8	0	0.073053	0.137345	3.87865	0.219351	1.71068	1.13626	16.0927	0.893154	4.45282	5.82888
A6_C2_V10	perturbation	post pH perturbation	E1_P5	128	16	0	0.0770194	0.22024	3.95095	0.173954	1.55984	1.02416	14.1298	0.704159	3.32503	5.59027
A6_C2_V10	perturbation	post pH perturbation	E1_P6	136	24	0	0.0727719	0.273065	4.69338	0.205764	1.6276	0.960238	13.7656	0.54495	5.38169	6.8477
A6_C2_V10	perturbation	post pH perturbation	E1_P7	144	32	0	0.0523897	0.287346	5.8256	0.372402	2.15786	1.10283	15.1896	0.224241	9.98271	6.72288
A6_C2_V10	perturbation	ongoing feed perturbation	E1_P8	152	2	0	0.0245835	0.280173	5.54222	0.377497	2.02444	1.14463	14.1674	0.246169	10.0997	6.82835
A6_C2_V10	perturbation	ongoing feed perturbation	E1_P9	160	10	0	0.0255021	0	7.42519	0.465436	2.015	1.10241	14.2429	6.10357	7.58822	4.41861
A6_C2_V10	perturbation	ongoing feed perturbation	E1_P10	168	18	0	0.0827211	0	17.8957	1.75216	5.55192	1.05707	6.46198	7.55606	11.6973	0.464966
A6_C2_V10	perturbation	post pH/feed perturbation	E1_P11	176	26	0	0.0592964	0	17.6953	1.47641	3.73806	0.976399	8.07644	6.2989	15.3821	1.63269
A6_C2_V10	perturbation	post pH/feed perturbation	E1_P12	184	34	0	0.0259308	0	18.5064	1.20069	2.95071	0.854186	9.88233	12.9966	13.1569	1.90691
A6_C2_V10	perturbation	post pH/feed perturbation	E1_P13	192	42	0	0.0270002	0	22.5461	0.986589	2.7328	1.20699	12.593	16.7559	10.9962	1.67457
A6_C2_V10	perturbation	post pH/feed perturbation	E1_P14	200	50	0	0.0232969	0	20.3631	0.891026	2.14367	1.07623	12.1908	10.4779	5.96694	1.34188
A6_C2_V10	perturbation	post pH/feed perturbation	E1_P15	208	58	0	0.0248004	0	20.1914	0.735589	1.85702	0.984462	12.7153	8.82206	4.55594	1.1823
A6_C2_V10	perturbation	post pH/feed perturbation	E1_P16	216	66	0	0.0269213	0	20.9115	0.666814	1.81757	1.22425	13.8174	10.0335	9.73877	2.62506
A6_C2_V10	perturbation	post pH/feed perturbation	E1_P17	224	74	0	0.0418094	0	16.7352	0.670238	1.67145	1.26738	14.121	5.017	10.7361	4.98882
A6_C2_V10	perturbation	post pH/feed perturbation	E1_P18	232	82	0	0.111707	0.0772427	12.1971	0.696985	1.93482	1.35606	14.8828	2.70505	11.913	7.10189
A6_C2_V10	perturbation	post pH/feed perturbation	E1_P19	240	90	0	0.0157652	0	11.7983	0.628856	2.13709	1.4359	16.019	4.63278	11.815	7.35285
A6_C2_V10	perturbation	post pH/feed perturbation	E1_P20	248	98	0	0.0137835	0	12.5036	0.623313	1.91493	1.23439	15.5175	8.28935	8.7481	6.68864
A6_C2_V10	perturbation	post pH/feed perturbation	E1_P21	256	106	0	0.0146703	0	14.5606	0.656112	1.71728	0.972823	15.1984	10.4835	10.4395	3.11288
A6_C2_V10	perturbation	post pH/feed perturbation	E1_P22	264	114	0	0.0241429	0	18.9119	0.623793	1.75676	1.42776	16.7288	13.2663	8.68333	3.55243
A6_C2_V10	perturbation	post pH/feed perturbation	E1_P23	272	122	0	0.0192125	0	17.9997	0.622513	1.6471	1.20118	14.4372	12.729	9.03052	2.71601
A6_C2_V10	perturbation	post pH/feed perturbation	E1_P24	280	130	0	0.0310881	0	19.2256	0.721247	1.79865	1.05762	13.6233	12.8781	8.06758	2.08877
A6_C2_V10	perturbation	post pH/feed perturbation	E1_P25	288	138	0	0.033817	0	22.7849	0.79816	2.14421	1.41168	14.0739	12.2302	10.2335	2.37891
A6_C2_V10	perturbation	post pH/feed perturbation	E1_P26	296	146	0	0.0348475	0	22.4237	0.903308	2.30385	1.21276	12.7526	12.6645	9.4957	2.43794
A6_C2_V10	perturbation	post pH/feed perturbation	E1_P27	308	158	0	0.03578	0	24.1874	0.945681	2.66669	1.07652	12.2572	10.6882	11.3047	1.42586
A6_C2_V11	control	control conditions	E1_C1	0	0	9.9914	9.88776	0.680189	2.42226	0.757713	0.618872	0.932373	0.212531	0.133561	0.0543113	0.00741665
A6_C2_V11	control	control conditions	E1_C2	8	8	8.03087	8.09533	0.481083	6.97013	0.85211	1.21074	0.878631	0.351914	2.14309	1.1657	0.0754056
A6_C2_V11	control	control conditions	E1_C3	16	16	0.07194	0.249323	0.13788	14.7898	0.740547	4.79051	0.644288	2.52243	3.21805	9.8887	0.66983
A6_C2_V11	control	control conditions	E1_C4	24	24	0	0.0726469	0.196	10.0697	0.887909	3.48056	0	7.14293	2.14676	9.21519	2.83439
A6_C2_V11	control	control conditions	E1_C5	32	32	0	0.0651925	0.245898	5.76635	0.818657	2.90191	0.726064	10.4367	2.06955	9.61162	4.25192
A6_C2_V11	control	control conditions	E1_C6	40	40	0	0.0612625	0.265857	4.42848	0.917558	2.59234	1.05194	11.4005	1.31633	10.7615	4.32739
A6_C2_V11	control	control conditions	E1_C7	48	48	0	0.0643205	0	6.02715	0.836405	2.73571	0.880213	13.0331	4.41161	11.727	7.79844
A6_C2_V11	control	control conditions	E1_C8	56	56	0	0.0608092	0	6.78477	0.572766	2.33437	1.36882	12.956	4.36918	10.8251	4.87884
A6_C2_V11	control	control conditions	E1_C9	64	64	0	0.07351	0	7.68145	0.448551	2.18486	1.45966	13.8516	2.89846	6.60985	3.43231
A6_C2_V11	control	control conditions	E1_C10	72	72	0	0.0623769	0	9.02716	0.415946	2.31347	1.24702	15.3159	3.42334	10.4644	5.72173
A6_C2_V11	control	control conditions	E1_C11	80	80	0	0.0617212	0.0757286	6.36673	0.304207	2.02691	1.50233	15.1144	0.981256	9.66243	5.88668
A6_C2_V11	control	control conditions	E1_C12	88	88	0	0.0617249	0.197054	4.7912	0.279536	1.96059	1.5223	15.0228	0.415067	6.32068	4.05767
A6_C2_V11	perturbation	ongoing pH perturbation	E1_P1	96	8	0	0.062514	0.274819	4.64999	0.226097	2.27061	1.41152	15.6587	0.805865	11.8559	7.49395
A6_C2_V11	perturbation	ongoing pH perturbation	E1_P2	104	16	0	0.0634041	0.323637	3.62639	0.232706	1.98008	1.2202	14.0362	0.342377	11.5569	6.68491
A6_C2_V11	perturbation	post pH perturbation	E1_P3	112	24	0	0.0592998	0.362126	3.40476	0.226588	1.59579	1.11878	13.2839	0.281966	8.04066	4.95679
A6_C2_V11	perturbation	post pH perturbation	E1_P4	120	8	0.735538	0.200883	0.425276	3.94905	0.292459	1.42268	0.886946	12.0923	0.252945	3.25215	3.42078
A6_C2_V11	perturbation	post pH perturbation	E1_P5	128	16	2.02439	1.01845	0.435713	4.11388	1.30514	1.52567	0.794193	9.06963	0.101839	2.92889	3.4133
A6_C2_V11	perturbation	post pH perturbation	E1_P6	136	24	3.45635	2.32104	0.447978	4.01303	1.8323	1.61042	0.808689	6.84612	0.112002	2.70128	2.21741
A6_C2_V11	perturbation	post pH perturbation	E1_P7	144	32	5.10844	3.77317	0.504466	4.41663	2.43451	1.86504	0.961805	5.59229	0.0498166	2.34458	1.59679
A6_C2_V11	perturbation	ongoing feed perturbation	E1_P8	152	2	4.33615	3.1888	0.483411	4.61061	2.81874	2.06173	0.874745	5.42437	0.0770041	2.63251	1.57317
A6_C2_V11	perturbation	ongoing feed perturbation	E1_P9	160	10	2.76069	2.84089	0.467349	5.23292	3.9339	2.20906	0.903033	5.40821	0.0758179	2.14973	1.46533
A6_C2_V11	perturbation	ongoing feed perturbation	E1_P10	168	18	6.80703	6.86661	0.522104	4.31996	3.24433	1.41679	1.18359	2.2543	0.021975	0.792875	0.300888
A6_C2_V11	perturbation	post pH/feed perturbation	E1_P11	176	26	5.81781	6.90211	0.494395	4.49437	3.80021	1.30623	1.22658	1.60333	0.00962507	0.71344	0.197232
A6_C2_V11	perturbation	post pH/feed perturbation	E1_P12	184	34	3.43296	4.02687	0.502977	7.62044	4.49906	4.14628	1.89181	1.24379	0.00668656	5.41571	0.0624079
A6_C2_V11	perturbation	post pH/feed perturbation	E1_P13	192	42	0.618821	1.0128	0.562783	11.3813	5.61248	8.24119	1.88262	1.08388	0.00265911	8.56669	0.0451162
A6_C2_V11	perturbation	post pH/feed perturbation	E1_P14	200	50	0.486922	0.887724	0.521549	10.7699	4.81232	8.49034	1.49293	0.95865	0.00203368	5.97387	0.0268898
A6_C2_V11	perturbation	post pH/feed perturbation	E1_P15	208	58	0.547066	0.988056	0.513168	10.4684	4.72053	8.4555	1.34091	0.927206	0.00184776	2.79594	0.0136273
A6_C2_V11	perturbation	post pH/feed perturbation	E1_P16	216	66	0.605418	1.46804	0.537031	10.7077	5.52268	8.58504	1.31114	0.801038	0	3.70151	0.0222821
A6_C2_V11	perturbation	post pH/feed perturbation	E1_P17	224	74	0.647645	2.36486	0.505241	9.6412	5.81939	7.41963	1.20772	0.65508	0.000892039	1.86186	0.0115593
A6_C2_V11	perturbation	post pH/feed perturbation	E1_P18	232	82	0.831684	3.23409	0.492389	8.87755	6.31854	6.40379	1.14421	0.607657	0.00271415	2.15951	0.0128357
A6_C2_V11	perturbation	post pH/feed perturbation	E1_P19	240	90	1.58374	4.4671	0.518677	8.61846	6.86503	5.71419	1.24001	0.588208	0.00144982	1.65076	0.00821563
A6_C2_V11	perturbation	post pH/feed perturbation	E1_P20	248	98	1.88102	3.90778	0.484014	8.15087	6.07603	5.38734	1.33256	0.47142	0	4.54272	0.00707363
A6_C2_V11	perturbation	post pH/feed perturbation	E1_P21	256	106	0.983935	1.3053	0.488726	9.97535	5.96637	8.05637	1.40552	0.401893	0	7.21357	0.00552573
A6_C2_V11	perturbation	post pH/feed perturbation	E1_P22	264	114	0.651713	0.859932	0.531109	11.7996	6.00007	10.3921	1.51735	0.33469	0	6.46665	0.000771622
A6_C2_V11	perturbation	post pH/feed perturbation	E1_P23	272	122	0.510225	0.559748	0.410431	9.20465	4.0938	8.34885	1.24533	0.249411	0	5.18903	0.00232978
A6_C2_V11	perturbation	post pH/feed perturbation	E1_P24	280	130	0.814838	0.636889	0.481417	11.0654	4.63679	10.1285	1.60597	0.308473	0	4.95172	0.000643018
A6_C2_V11	perturbation	post pH/feed perturbation	E1_P25	288	138	0.969081	0.57184	0.506538	11.9205	4.91623	10.6964	1.69475	0.239451	0	6.89281	0.00147845
A6_C2_V11	perturbation	post pH/feed perturbation	E1_P26	296	146	1.18174	0.599596	0.492641	11.6299	4.63626	10.362	1.67586	0.217661	0	5.48375	0.00165256
A6_C2_V11	perturbation	post pH/feed perturbation	E1_P27	308	158	0.688872	0.302411	0.481504	12.194	4.63478	10.5273	1.6298	0.208184	0	8.3603	0.0012775
A6_C2_V12	control	control conditions	E1_C1	0	0	10.5113	10.2715	0.714328	2.55558	0.822538	0.660624	0.995369	0.25179	0.104959	0.0516088	0.00775817
A6_C2_V12	control	control conditions	E1_C2	8	8	8.20616	8.3078	0.484047	7.45044	0.885647	1.2977	0.87887	0.382058	2.9184	2.2078	0.103502
A6_C2_V12	control	control conditions	E1_C3	16	16	0.0774811	0.248302	0.129465	15.2512	0.780208	4.89888	0.669698	2.53522	1.37918	4.64933	0.295289
A6_C2_V12	control	control conditions	E1_C4	24	24	0	0.0808894	0.203913	10.9802	0.929376	3.72593	0.762429	7.59943	2.40455	9.33739	2.8025
A6_C2_V12	control	control conditions	E1_C5	32	32	0	0.06896	0.25736	6.21542	0.863719	2.97941	0.784805	10.1926	0.963366	7.39158	2.76379
A6_C2_V12	control	control conditions	E1_C6	40	40	0	0.0640846	0.285822	4.62615	0.866798	2.61855	1.40559	11.5896	1.44174	9.90444	5.49523
A6_C2_V12	control	control conditions	E1_C7	48	48	0	0.0743181	0	6.21037	0.843233	2.82255	0.914365	13.645	3.81624	15.0146	7.53069
A6_C2_V12	control	control conditions	E1_C8	56	56	0	0.0644253	0	7.23129	0.626135	2.47536	1.40245	13.7147	4.0073	11.9289	5.10028
A6_C2_V12	control	control conditions	E1_C9	64	64	0	0.0610376	0	7.81143	0.467446	2.20067	1.43902	13.9696	4.29735	10.1736	5.50087
A6_C2_V12	control	control conditions	E1_C10	72	72	0	0.0632121	0	9.72637	0.421185	2.44419	1.40183	16.0237	3.79917	8.60385	6.93614
A6_C2_V12	control	control conditions	E1_C11	80	80	0	0.0609955	0	7.4571	0.330564	2.11959	1.43571	15.3396	0.750566	5.53193	3.34596
A6_C2_V12	control	control conditions	E1_C12	88	88	0	0.0628624	0.156134	5.37809	0.295259	2.02874	1.63786	15.8174	0.866289	10.7074	6.82173
A6_C2_V12	perturbation	ongoing pH perturbation	E1_P1	96	8	0	0.067597	0.252528	5.01743	0.286645	2.43322	1.41233	17.0051	1.16732	10.0794	10.321
A6_C2_V12	perturbation	ongoing pH perturbation	E1_P2	104	16	0	0.06367	0.307318	3.73428	0.222277	2.01511	1.38673	14.9111	0.402065	7.91768	4.06935
A6_C2_V12	perturbation	post pH perturbation	E1_P3	112	24	0	0.061629	0.34911	3.4018	0.231218	1.60187	1.35663	13.777	0.177013	6.91064	4.73449
A6_C2_V12	perturbation	post pH perturbation	E1_P4	120	8	0.750885	0.189283	0.436779	4.14142	0.2565	1.47731	0.956297	13.1283	0.220392	6.29967	4.50284
A6_C2_V12	perturbation	post pH perturbation	E1_P5	128	16	1.93096	0.936939	0.436212	4.20577	1.33998	1.49061	0.812568	9.58368	0.175623	3.95814	3.22997
A6_C2_V12	perturbation	post pH perturbation	E1_P6	136	24	3.4271	2.32785	0.451507	4.09871	1.92208	1.59453	0.852203	7.32818	0.125153	2.45801	2.92545
A6_C2_V12	perturbation	post pH perturbation	E1_P7	144	32	5.25238	3.96869	0.526669	4.71226	2.42845	1.83151	1.02566	6.29884	0.0994609	2.84641	1.81126
A6_C2_V12	perturbation	ongoing feed perturbation	E1_P8	152	2	2.99175	3.29258	0.488194	5.30752	3.82498	1.92183	1.03396	5.91582	0.0355718	1.80917	1.13538
A6_C2_V12	perturbation	ongoing feed perturbation	E1_P9	160	10	1.67886	2.99845	0.476678	5.91226	4.68484	2.02775	1.0327	5.99475	0	0.948429	2.37107
A6_C2_V12	perturbation	ongoing feed perturbation	E1_P10	168	18	6.83537	7.45156	0.55785	4.94904	3.83411	1.44369	1.2743	2.73181	0.0212961	0.955483	0.370071
A6_C2_V12	perturbation	post pH/feed perturbation	E1_P11	176	26	4.94568	5.41347	0.511603	6.68948	4.1805	2.81521	1.74169	2.08163	0.00694434	3.87091	0.340851
A6_C2_V12	perturbation	post pH/feed perturbation	E1_P12	184	34	0.0703775	0.233224	0.514806	9.45244	4.12317	6.3667	1.59358	4.61972	0.00299918	6.46483	1.01556
A6_C2_V12	perturbation	post pH/feed perturbation	E1_P13	192	42	0	0.0320894	0.572074	8.00237	4.29334	5.521	1.48204	8.00975	0.00459503	7.62959	2.56505
A6_C2_V12	perturbation	post pH/feed perturbation	E1_P14	200	50	0	0.0657098	0.369758	3.22994	2.27566	2.64535	0.793003	6.72982	0.00402086	7.74122	3.15414
A6_C2_V12	perturbation	post pH/feed perturbation	E1_P15	208	58	0	0.0489234	0.489377	3.57744	3.0583	3.19481	1.03222	10.9409	0	9.16914	3.25297
A6_C2_V12	perturbation	post pH/feed perturbation	E1_P16	216	66	0	0.0486537	0.506348	3.54234	3.43699	3.35094	1.04704	12.2528	0	7.24025	5.7237
A6_C2_V12	perturbation	post pH/feed perturbation	E1_P17	224	74	0	0.0478123	0.462969	3.23625	3.33501	2.88188	0.958478	11.7212	0	9.4309	3.89407
A6_C2_V12	perturbation	post pH/feed perturbation	E1_P18	232	82	0	0.0560237	0.438928	3.32871	3.01736	2.7799	0.916309	11.9906	0.00785751	6.9683	4.6654
A6_C2_V12	perturbation	post pH/feed perturbation	E1_P19	240	90	0	0.0834859	0.33273	4.75709	3.13746	3.65616	0.995307	12.6223	0	5.47343	1.91052
A6_C2_V12	perturbation	post pH/feed perturbation	E1_P20	248	98	0	0.0659483	0.354899	4.89634	2.79694	3.40748	0.949856	11.5788	0	10.5605	5.41507
A6_C2_V12	perturbation	post pH/feed perturbation	E1_P21	256	106	0	0.0586238	0.361582	3.95391	2.35445	3.22434	0.962519	11.8953	0	11.2108	5.78992
A6_C2_V12	perturbation	post pH/feed perturbation	E1_P22	264	114	0	0.066434	0.395554	4.24735	2.60215	3.91183	1.19082	14.1948	0	12.4349	8.98556
A6_C2_V12	perturbation	post pH/feed perturbation	E1_P23	272	122	0	0.019365	0.366487	3.42127	2.20633	3.44313	1.11186	12.6052	0	13.6275	5.14565
A6_C2_V12	perturbation	post pH/feed perturbation	E1_P24	280	130	0	0.0488333	0.373189	3.42682	2.15508	3.76451	1.25529	12.6729	0	9.55374	4.97533
A6_C2_V12	perturbation	post pH/feed perturbation	E1_P25	288	138	0	0.0351806	0.387129	4.35319	2.74	4.98339	1.49776	13.7299	0	11.7426	4.29925
A6_C2_V12	perturbation	post pH/feed perturbation	E1_P26	296	146	0	0.0404825	0.245493	2.76362	1.43869	2.93759	0.851931	7.49773	0	12.3638	4.76885
A6_C2_V12	perturbation	post pH/feed perturbation	E1_P27	308	158	0	0.0240394	0.38752	4.34308	2.48581	5.44188	1.41469	12.1705	0	14.2379	3.48154
A7_C1_V1	control	control conditions	E2_C1	0	0	10.6517	10.3446	0.804431	10.2547	0.264726	0.7049	1.12154	0.799808	0.075301	0.067148	0.0376536
A7_C1_V1	control	control conditions	E2_C3	12	12	0.674985	1.26544	0.666021	1.89833	7.01116	1.25227	4.391	10.8053	0.423753	11.247	6.03048
A7_C1_V1	control	control conditions	E2_C5	24	24	0	0.0202483	0.146228	2.29408	0.251646	1.06312	0.468877	3.35367	0.0812775	16.1287	9.67635
A7_C1_V1	control	control conditions	E2_C7	36	36	0	0.065765	0.0666317	11.5526	2.16355	4.69842	1.49392	9.2661	0.0182957	39.3349	0.061748
A7_C1_V1	control	control conditions	E2_C9	48	48	0	0.121299	0.070046	14.7929	5.67032	5.39374	2.90158	11.0294	0	14.4169	0.283071
A7_C1_V1	control	control conditions	E2_C11	60	60	0	0.0637805	0.183153	10.9897	5.25836	3.92078	2.19479	10.4899	0.124194	23.2362	3.10344
A7_C1_V1	control	control conditions	E2_C13	72	72	0.0642298	0.045724	0.0240653	0.829945	4.92357	0	7.67986	12.5876	12.459	14.7996	4.34879
A7_C1_V1	control	control conditions	E2_C15	84	84	0	0.0307799	0.0254348	18.1926	2.07994	2.37264	0.814287	12.7833	8.13481	14.7545	5.86361
A7_C1_V1	control	control conditions	E2_C17	96	96	0	0.0264832	0.0297352	20.4602	2.04316	2.83036	1.13758	16.0383	4.64548	13.8786	9.69747
A7_C1_V1	control	control conditions	E2_C19	108	108	0	0.0247535	0.017455	17.2208	1.39796	2.21301	0.9132	15.2476	8.92607	12.0381	8.89203
A7_C1_V1	control	control conditions	E2_C20	120	120	0	0.0210041	0.0197518	16.8056	1.06363	2.64236	1.26563	18.4488	2.11916	9.32042	5.5083
A7_C1_V1	control	control conditions	E2_C21	132	132	0	0.0170419	0.015708	14.7451	0.840673	2.25423	0.926259	15.9811	4.45984	9.30249	5.54649
A7_C1_V1	control	control conditions	E2_C22	144	144	0	0	0.0174961	16.6231	1.02121	2.50712	1.18683	17.7547	1.26985	7.36272	3.0605
A7_C1_V1	control	control conditions	E2_C23	156	156	0	0.0323946	0	15.1909	1.17811	2.23237	0.811162	15.3951	3.36417	9.73502	5.18612
A7_C1_V1	control	control conditions	E2_C24	168	168	0	0.0368078	0	17.3239	1.87422	2.87494	1.0018	16.62	5.24516	12.5248	8.6458
A7_C1_V1	control	control conditions	E2_C25	180	180	0	0.0360852	0	16.6942	1.61092	2.53511	0.740851	14.855	4.84392	15.3964	6.36959
A7_C1_V1	control	control conditions	E2_C26	192	192	0	0.0397711	0	19.5886	1.66927	2.97889	0.925873	16.0461	7.12273	15.5558	8.38619
A7_C1_V1	control	control conditions	E2_C27	204	204	0	0.0328872	0	18.0638	1.6432	2.58207	0.687342	13.5755	7.28816	13.0492	4.49921
A7_C1_V1	control	control conditions	E2_C28	216	216	0	0.0387542	0	22.4965	2.05074	3.05893	0.896302	15.3781	8.37244	15.2638	5.82949
A7_C1_V1	control	control conditions	E2_C29	228	228	0	0.0331496	0	20.5258	1.96988	2.54802	0.695063	12.9712	10.4238	15.4957	4.36018
A7_C1_V1	control	control conditions	E2_C30	240	240	0	0.0323022	0	24.3479	2.20251	2.89165	0.873212	14.4955	6.65172	12.8096	3.43639
A7_C1_V1	control	control conditions	E2_C31	252	252	0	0.0325139	0	20.9024	2.05145	2.43691	0.673566	12.4748	8.17833	11.2501	9.67769
A7_C1_V2	control	control conditions	E2_C1	0	0	11.4564	11.1651	0.812624	2.3641	0.856462	0.849877	1.17478	0.604124	0.0917195	0.0175769	0.0244099
A7_C1_V2	control	control conditions	E2_C3	12	12	1.98022	0.317183	0.682453	12.139	2.20628	5.39545	2.67683	5.05712	0.455325	13.7519	6.4096
A7_C1_V2	control	control conditions	E2_C5	24	24	0	0.0589021	0.627173	6.45221	1.43654	4.91323	1.95115	13.7589	0.0685876	15.1056	6.48592
A7_C1_V2	control	control conditions	E2_C7	36	36	0	0.0720974	0.0760082	9.99804	2.45102	4.6863	1.51684	8.86939	0.0182489	38.4497	0.0474472
A7_C1_V2	control	control conditions	E2_C9	48	48	0	0.0576404	0.0703541	10.7248	5.67859	5.09086	3.52519	10.5075	0	15.531	0.0204217
A7_C1_V2	control	control conditions	E2_C11	60	60	0	0.0494625	0.0692083	9.41619	5.8464	3.90578	3.01966	9.75193	1.51021	20.7646	1.54031
A7_C1_V2	control	control conditions	E2_C13	72	72	0	0.0332999	0.026523	19.3471	4.01139	3.43538	0.965628	12.8318	11.3393	15.0593	3.99061
A7_C1_V2	control	control conditions	E2_C15	84	84	0	0.0303335	0.0282911	17.543	2.33825	2.38347	0.820741	13.0641	5.75145	13.6327	7.08088
A7_C1_V2	control	control conditions	E2_C17	96	96	0	0.0259058	0.0246751	18.4641	2.00804	2.35129	0.949647	16.1073	9.06882	12.0137	9.75769
A7_C1_V2	control	control conditions	E2_C19	108	108	0	0.0243368	0.0223069	16.2999	1.44042	1.8272	0.861403	14.8499	6.34117	12.2612	12.0371
A7_C1_V2	control	control conditions	E2_C20	120	120	0	0.0216544	0.0228151	16.6609	1.3939	2.06477	1.04227	17.0217	3.72253	8.97575	6.67122
A7_C1_V2	control	control conditions	E2_C21	132	132	0	0.0183442	0.0171433	14.6509	0.860404	1.74624	0.914069	15.6872	3.82734	9.56748	6.66462
A7_C1_V2	control	control conditions	E2_C22	144	144	0	0	0.0216285	15.0375	0.843313	2.14671	1.11122	18.143	3.26994	7.88395	8.52691
A7_C1_V2	control	control conditions	E2_C23	156	156	0	0.0317275	0	14.0282	0.884763	1.83163	0.866503	16.4119	2.45556	5.68909	4.41383
A7_C1_V2	control	control conditions	E2_C24	168	168	0	0.0196517	0	15.9942	1.1396	2.05825	1.03068	17.472	3.26918	8.55662	9.22105
A7_C1_V2	control	control conditions	E2_C25	180	180	0	0.0222045	0	15.3952	1.36101	1.98547	0.779513	15.0131	6.03512	10.8938	8.06816
A7_C1_V2	control	control conditions	E2_C26	192	192	0	0.0366648	0	17.8915	1.40177	2.13743	0.940134	16.4544	4.23192	7.48058	13.4085
A7_C1_V2	control	control conditions	E2_C27	204	204	0	0.035998	0	16.4171	1.44215	1.91469	0.732219	14.5396	4.20431	7.02282	8.67757
A7_C1_V2	control	control conditions	E2_C28	216	216	0	0.0328511	0	19.4613	1.86752	2.22654	0.889611	15.6127	4.17671	6.56506	3.94663
A7_C1_V2	control	control conditions	E2_C29	228	228	0	0.0440188	0	18.2112	1.8642	1.92255	0.701996	13.7066	6.63456	9.40061	6.4839
A7_C1_V2	control	control conditions	E2_C30	240	240	0	0.0226704	0	20.9705	2.12136	1.94467	0.788951	14.7301	7.69279	14.7129	5.76485
A7_C1_V2	control	control conditions	E2_C31	252	252	0	0.0289588	0	19.8705	2.22303	1.766	0.635295	13.1663	9.21163	9.86197	5.95688
A7_C1_V3	control	control conditions	E2_C1	0	0	11.2987	10.6116	0.797196	2.32103	0.313748	0.638188	1.15618	0.571594	0.0963254	0.0162825	0.0250472
A7_C1_V3	control	control conditions	E2_C3	12	12	1.73438	0.228894	0.670966	12.0251	2.02808	5.21816	2.53965	5.14373	0.356609	10.601	5.29337
A7_C1_V3	control	control conditions	E2_C5	24	24	0	0.0560311	0.627352	6.28994	1.02282	4.4426	1.94711	13.0001	0.0756436	19.1208	9.68344
A7_C1_V3	control	control conditions	E2_C7	36	36	0	0.0696329	0.0648338	9.05054	2.20265	4.65847	1.51568	9.01081	0	45.7713	0.0688743
A7_C1_V3	control	control conditions	E2_C9	48	48	0	0.036327	0.0700538	10.3529	5.04778	4.81883	2.72021	10.2122	0	25.4334	0.765937
A7_C1_V3	control	control conditions	E2_C11	60	60	0	0.0478188	0.103188	8.61337	4.78627	3.75781	1.83167	10.3716	1.43672	25.8265	4.73167
A7_C1_V3	control	control conditions	E2_C13	72	72	0	0.0293639	0.0271008	17.6924	3.06113	3.20956	0.899001	12.8934	10.0916	12.0559	4.58272
A7_C1_V3	control	control conditions	E2_C15	84	84	0	0.0290554	0.0213337	16.2734	1.87483	2.32746	0.861047	13.0238	5.15238	14.3947	8.83893
A7_C1_V3	control	control conditions	E2_C17	96	96	0	0.0240322	0.0261331	17.1459	1.75164	2.44423	1.02582	15.9833	5.01095	9.98907	7.28762
A7_C1_V3	control	control conditions	E2_C19	108	108	0	0.0245078	0.0218656	16.4197	1.14428	1.84614	0.892075	14.529	8.92585	11.6737	8.41139
A7_C1_V3	control	control conditions	E2_C20	120	120	0	0.020608	0.0194917	16.8271	1.01776	1.97114	1.03589	16.6318	3.18501	12.1151	5.91035
A7_C1_V3	control	control conditions	E2_C21	132	132	0	0.016745	0.0181155	14.5346	0.719572	1.68604	0.920304	16.0299	3.60685	7.89512	5.74328
A7_C1_V3	control	control conditions	E2_C22	144	144	0	0	0.0235434	15.2302	0.851546	1.90865	1.03572	17.5562	2.9678	9.34436	9.84381
A7_C1_V3	control	control conditions	E2_C23	156	156	0	0.0344534	0	14.4579	1.04394	1.81962	0.831703	15.9866	3.32815	7.94748	5.44233
A7_C1_V3	control	control conditions	E2_C24	168	168	0	0.0274879	0	16.2349	1.40886	2.0325	0.942984	16.5375	5.70485	13.2343	8.44754
A7_C1_V3	control	control conditions	E2_C25	180	180	0	0.0352717	0	15.8822	1.42194	1.98474	0.764911	15.1458	4.71449	10.0649	5.76186
A7_C1_V3	control	control conditions	E2_C26	192	192	0	0.0296836	0	17.847	1.24172	2.01321	0.903701	15.9367	4.41151	9.31631	6.51863
A7_C1_V3	control	control conditions	E2_C27	204	204	0	0.0382198	0	18.0464	1.34915	1.85768	0.758573	14.1064	8.51665	12.6641	4.53541
A7_C1_V3	control	control conditions	E2_C28	216	216	0	0.0344579	0	21.74	1.75105	2.07682	0.822726	14.7866	9.81085	7.67488	3.37739
A7_C1_V3	control	control conditions	E2_C29	228	228	0	0.0382473	0	21.3259	1.91535	1.81811	0.683462	12.6571	9.8718	6.56016	6.53815
A7_C1_V3	control	control conditions	E2_C30	240	240	0	0.0212452	0	22.949	2.37691	1.94109	0.74264	13.0529	9.18914	8.05152	3.74583
A7_C1_V3	control	control conditions	E2_C31	252	252	0	0.0227186	0	20.4285	2.20705	1.83147	0.613391	12.2127	10.5238	8.66285	5.01433
A7_C1_V4	control	control conditions	E2_C1	0	0	11.2425	10.7087	0.786692	2.30864	0.307964	0.635121	1.14685	0.64442	0.0880015	0.0153141	0.0222597
A7_C1_V4	control	control conditions	E2_C3	12	12	1.77793	0.239765	0.665409	11.935	2.15672	5.19197	2.53316	5.15002	0.509907	12.3176	6.25683
A7_C1_V4	control	control conditions	E2_C5	24	24	0	0.0948985	0.597763	6.13614	1.07041	4.45826	1.8279	12.6867	0.0716862	18.7942	8.41437
A7_C1_V4	control	control conditions	E2_C7	36	36	0	0.0727164	0.0689881	9.12647	2.43225	4.71741	1.49496	8.97666	0	34.3178	0.0428824
A7_C1_V4	control	control conditions	E2_C9	48	48	0	0.0709681	0.0776777	10.0534	4.94012	4.76308	2.6686	9.92218	0	25.0596	0.768166
A7_C1_V4	control	control conditions	E2_C11	60	60	0	0.0229007	0.0279151	10.1089	4.57916	3.68783	0.799423	10.2432	5.58993	17.044	4.12888
A7_C1_V4	control	control conditions	E2_C13	72	72	0	0.0314833	0.0265008	18.3777	2.83072	3.1491	0.880713	12.8881	13.0809	14.2225	5.80797
A7_C1_V4	control	control conditions	E2_C15	84	84	0	0.028559	0.024719	15.7731	2.30827	2.53223	0.921292	13.5261	3.4328	18.3074	11.7135
A7_C1_V4	control	control conditions	E2_C17	96	96	0	0.0244306	0.020958	16.0893	1.62349	2.37554	0.983934	15.8013	7.73768	14.4266	10.011
A7_C1_V4	control	control conditions	E2_C19	108	108	0	0.0231209	0.0228054	16.2292	1.1798	1.87447	0.878529	14.8688	11.5139	15.2034	10.4549
A7_C1_V4	control	control conditions	E2_C20	120	120	0	0.0187124	0.0234296	16.1791	1.00161	1.99258	1.03636	16.3992	3.20353	8.20391	7.01694
A7_C1_V4	control	control conditions	E2_C21	132	132	0	0.0177193	0.0173955	14.3046	0.722732	1.77604	0.954091	15.6944	3.31013	8.62622	5.51985
A7_C1_V4	control	control conditions	E2_C22	144	144	0	0.0384837	0.0181474	14.5353	0	2.03037	1.05099	17.2311	2.1528	9.60689	6.97588
A7_C1_V4	control	control conditions	E2_C23	156	156	0	0.0389753	0	14.3185	0.955361	1.92601	0.819686	15.9262	3.43432	9.48378	5.67636
A7_C1_V4	control	control conditions	E2_C24	168	168	0	0.0394154	0	17.2474	1.28904	2.15759	0.903396	16.1568	4.33862	10.4263	5.94402
A7_C1_V4	control	control conditions	E2_C25	180	180	0	0.0437218	0	15.8291	1.54319	2.28493	0.723125	14.2469	4.62254	12.0347	6.96913
A7_C1_V4	control	control conditions	E2_C26	192	192	0	0.0321087	0	17.8247	1.77602	2.76251	0.860387	14.7953	4.90647	13.6431	6.96913
A7_C1_V4	control	control conditions	E2_C27	204	204	0	0.042759	0	17.3697	1.82943	2.65009	0.693032	13.3521	5.5681	12.7526	6.65797
A7_C1_V4	control	control conditions	E2_C28	216	216	0	0.0332883	0	20.0389	2.0404	3.01501	0.759334	13.5538	6.32824	12.19	5.21381
A7_C1_V4	control	control conditions	E2_C29	228	228	0	0.0397036	0	19.9059	2.37606	2.79083	0.617405	11.7156	7.08838	11.6275	3.76966
A7_C1_V4	control	control conditions	E2_C30	240	240	0	0.0351787	0	22.3342	2.49901	2.72367	0.673391	12.4805	5.66242	12.0996	2.50379
A7_C1_V4	control	control conditions	E2_C31	252	252	0	0.0346732	0	21.5188	2.37447	2.45983	0.553995	11.9915	10.0465	10.1843	3.1366
A7_C1_V5	control	control conditions	E2_C1	0	0	11.1955	10.5878	0.779215	2.27665	0.306582	0.629825	1.15375	0.578183	0.104802	0.0183446	0.0266601
A7_C1_V5	control	control conditions	E2_C3	12	12	1.42855	0.0493208	0.660501	12.1841	2.05018	4.93687	2.44555	5.47144	0.295057	10.7543	5.97745
A7_C1_V5	control	control conditions	E2_C5	24	24	0	0.102093	0.603996	6.27372	1.05477	4.40675	1.84609	12.8095	0.113631	19.4739	8.79919
A7_C1_V5	control	control conditions	E2_C7	36	36	0	0.0625454	0.0770639	9.27072	2.0898	4.67599	1.49609	8.94474	0	46.3497	0.0763915
A7_C1_V5	control	control conditions	E2_C9	48	48	0	0.0578179	0.094992	10.0249	4.50297	4.59993	1.96466	10.1239	0	32.0853	2.14291
A7_C1_V5	control	control conditions	E2_C11	60	60	0	0.0493407	0.131213	8.16153	4.24624	3.68614	1.46436	10.7626	0.989914	24.8237	6.79314
A7_C1_V5	control	control conditions	E2_C13	72	72	0	0.0272099	0.0219673	16.0849	2.71123	3.12182	0.927264	12.9235	11.098	12.5861	6.6258
A7_C1_V5	control	control conditions	E2_C15	84	84	0	0.0455595	0.0162796	15.0544	0.837765	1.64888	0.90847	11.0109	3.89064	13.1864	7.86798
A7_C1_V5	control	control conditions	E2_C17	96	96	0	0.0260419	0.0228682	17.0968	1.55079	2.29656	1.02015	15.4803	6.90062	14.4962	7.42605
A7_C1_V5	control	control conditions	E2_C19	108	108	0	0.0233463	0.0192129	15.0554	1.08649	1.70907	0.924871	15.3476	7.14567	13.0977	9.53024
A7_C1_V5	control	control conditions	E2_C20	120	120	0	0.0183744	0.0196538	16.0817	0.948223	1.82398	1.07531	16.8885	3.15708	9.37149	9.11987
A7_C1_V5	control	control conditions	E2_C21	132	132	0	0.0136276	0.0116443	14.5899	0.954382	1.68129	0.93252	15.8177	2.8565	8.26621	5.53235
A7_C1_V5	control	control conditions	E2_C22	144	144	0	0.0374285	0.0164571	15.7556	1.1471	1.78676	1.01794	16.7146	2.88887	9.00274	6.74
A7_C1_V5	control	control conditions	E2_C23	156	156	0	0.043737	0	14.6583	1.33017	1.69458	0.796346	15.1476	3.61719	6.75393	7.14495
A7_C1_V5	control	control conditions	E2_C24	168	168	0	0.0422842	0	16.0378	1.46687	2.0592	0.904116	15.6901	3.38258	7.74567	5.23294
A7_C1_V5	control	control conditions	E2_C25	180	180	0	0.0480955	0	16.4931	1.53082	2.12289	0.739374	14.0374	7.27562	12.2688	4.97167
A7_C1_V5	control	control conditions	E2_C26	192	192	0	0.0340591	0	20.289	1.66615	2.29377	0.799664	14.6967	4.89025	9.51171	2.63404
A7_C1_V5	control	control conditions	E2_C27	204	204	0	0.0422474	0	19.6789	1.72038	2.02099	0.709822	13.04	8.78824	7.38347	8.58202
A7_C1_V5	control	control conditions	E2_C28	216	216	0	0.0355382	0	20.9767	1.84155	2.21206	0.788604	14.0172	6.15733	12.4595	4.241
A7_C1_V5	control	control conditions	E2_C29	228	228	0	0.0595227	0	19.128	1.9799	2.20986	0.733575	12.8719	8.59767	11.769	6.16778
A7_C1_V5	control	control conditions	E2_C30	240	240	0	0.0433066	0	19.8551	2.07073	2.21614	0.776613	13.0253	7.52014	10.5451	5.67324
A7_C1_V5	control	control conditions	E2_C31	252	252	0	0.0344329	0	19.5757	1.9532	2.08879	0.640909	12.0336	11.1284	9.54563	3.45748
A7_C1_V6	control	control conditions	E2_C1	0	0	11.2843	10.9042	0.782049	2.30692	0.31117	0.632363	1.17202	0.572392	0.108146	0.0179043	0.0261677
A7_C1_V6	control	control conditions	E2_C3	12	12	0.900128	0.0337336	0.681126	12.3869	2.13378	4.62821	2.41413	6.27474	0.254467	7.05965	7.0619
A7_C1_V6	control	control conditions	E2_C5	24	24	0	0.097389	0.595831	6.29945	1.04468	4.18994	1.83337	13.4535	0.0992885	20.485	9.87168
A7_C1_V6	control	control conditions	E2_C7	36	36	0	0.112603	0.379925	8.89442	1.50386	3.5911	1.37721	10.3775	0.0336189	22.5573	2.90723
A7_C1_V6	control	control conditions	E2_C9	48	48	0	0.0710169	0.267893	9.81025	3.50949	3.6951	1.41906	11.4068	0.496685	19.4717	5.27007
A7_C1_V6	control	control conditions	E2_C11	60	60	0	0.0308015	0.0229313	15.5496	2.32516	2.92248	0.930273	11.71	10.112	13.1584	4.648
A7_C1_V6	control	control conditions	E2_C13	72	72	0	0.0318872	0.0182696	16.2575	1.81839	2.54555	1.06518	14.3363	2.91481	13.9893	7.74567
A7_C1_V6	control	control conditions	E2_C15	84	84	0	0.0276674	0.0210506	14.7214	1.44482	2.0742	0.913206	14.358	6.9033	13.0468	8.92256
A7_C1_V6	control	control conditions	E2_C17	96	96	0	0.0260199	0.0183846	14.7319	1.16401	2.03017	1.08262	17.0342	3.70172	11.7963	9.90835
A7_C1_V6	control	control conditions	E2_C19	108	108	0	0.0245454	0.0176392	15.1107	1.13132	1.7534	0.909894	15.2518	8.30481	11.6923	7.78903
A7_C1_V6	control	control conditions	E2_C20	120	120	0	0.0196791	0.0183493	16.0066	1.24379	1.59991	0.965472	16.3813	4.23982	6.49136	4.41334
A7_C1_V6	control	control conditions	E2_C21	132	132	0	0.0216424	0.0106398	15.6754	1.17366	1.48272	0.821981	15.2069	5.63742	5.12371	4.65281
A7_C1_V6	control	control conditions	E2_C22	144	144	0	0.0171563	0.0152075	16.5739	1.18525	1.53569	0.950632	16.7078	5.42725	7.72704	6.30241
A7_C1_V6	control	control conditions	E2_C23	156	156	0	0.0410437	0	14.5958	1.10529	1.38977	0.799013	15.6278	4.7203	6.45564	6.9023
A7_C1_V6	control	control conditions	E2_C24	168	168	0	0.0377646	0	15.6751	1.1259	1.42581	0.862846	16.6011	4.57761	5.0755	3.50207
A7_C1_V6	control	control conditions	E2_C25	180	180	0	0.0392749	0	15.429	1.20683	1.37067	0.768612	15.4515	6.08911	4.73928	8.43504
A7_C1_V6	control	control conditions	E2_C26	192	192	0	0.0443849	0	16.6108	1.07237	1.35807	0.866142	16.3635	7.48018	9.41609	6.8891
A7_C1_V6	control	control conditions	E2_C27	204	204	0	0.0261442	0	14.3631	0.975761	1.2519	0.77535	15.4375	6.17406	7.99865	7.50566
A7_C1_V6	control	control conditions	E2_C28	216	216	0	0.0279671	0	15.1885	1.07312	1.27765	0.831505	16.1347	5.85984	6.27996	5.85185
A7_C1_V6	control	control conditions	E2_C29	228	228	0	0.0267245	0	15.1061	1.06499	1.16311	0.773064	15.1695	6.59317	4.76233	7.18839
A7_C1_V6	control	control conditions	E2_C30	240	240	0	0.0242969	0	15.9929	1.11441	1.15424	0.829251	16.0399	7.3265	3.24469	8.52492
A7_C1_V6	control	control conditions	E2_C31	252	252	0	0.0248467	0	13.8787	1.04573	1.05038	0.722394	14.8915	6.94661	4.93159	4.97764
A7_C1_V7	control	control conditions	E2_C1	0	0	11.212	10.6646	0.769455	2.29184	0.300918	0.626723	1.14763	0.486109	0.0815947	0.0188735	0.024083
A7_C1_V7	control	control conditions	E2_C3	12	12	1.58481	0.175242	0.645696	11.7849	2.07166	5.04763	2.44018	5.10633	0.35436	11.1191	5.82983
A7_C1_V7	control	control conditions	E2_C5	24	24	0	0.0651923	0.617253	6.32646	1.12098	4.55146	1.95185	12.7999	0.0345685	10.9717	4.8255
A7_C1_V7	control	control conditions	E2_C7	36	36	0	0.0965287	0.061926	8.99284	2.11172	4.538	1.49795	9.06793	0	36.6091	0.0379403
A7_C1_V7	control	control conditions	E2_C9	48	48	0	0.0726025	0.0796766	10.4259	4.87977	4.77355	2.42122	9.85764	0	37.8991	1.88198
A7_C1_V7	control	control conditions	E2_C11	60	60	0	0.027806	0.0871512	8.41958	4.37126	3.68962	1.52629	10.5626	1.78903	19.6547	5.08318
A7_C1_V7	control	control conditions	E2_C13	72	72	0	0.0269418	0.0235582	16.8173	2.69695	3.16731	0.926387	12.9876	15.8895	12.9153	4.62679
A7_C1_V7	control	control conditions	E2_C15	84	84	0	0.0308938	0.0164385	16.6492	1.77487	2.39514	0.833592	13.3245	6.58049	11.0984	6.59114
A7_C1_V7	control	control conditions	E2_C17	96	96	0	0.0245901	0.0152445	17.8732	1.48493	2.43733	0.962773	15.9725	8.68331	14.3471	12.8076
A7_C1_V7	control	control conditions	E2_C19	108	108	0	0.0234902	0.0236942	15.3006	1.08078	1.93401	0.936861	15.2082	5.57449	12.8861	8.3863
A7_C1_V7	control	control conditions	E2_C20	120	120	0	0.0157626	0.0176272	14.68	0.965061	2.20055	1.11095	17.8869	3.26683	9.58492	6.27465
A7_C1_V7	control	control conditions	E2_C21	132	132	0	0.0290951	0.0117031	13.4085	0.869752	1.86039	0.961996	16.1244	2.64339	7.52116	7.21987
A7_C1_V7	control	control conditions	E2_C22	144	144	0	0	0.0195666	16.3297	1.2369	2.11496	1.07117	18.0679	6.15517	18.3827	12.5862
A7_C1_V7	control	control conditions	E2_C23	156	156	0	0.0361714	0	15.1815	1.25107	1.95582	0.852734	15.92	6.20869	15.9082	11.1764
A7_C1_V7	control	control conditions	E2_C24	168	168	0	0.02332	0	15.3938	1.19177	1.94767	0.917262	15.9742	4.08257	14.2261	6.42041
A7_C1_V7	control	control conditions	E2_C25	180	180	0	0.0341366	0	14.9175	1.13284	1.92865	0.764671	15.1298	5.63151	13.0245	5.88957
A7_C1_V7	control	control conditions	E2_C26	192	192	0	0.0310182	0	16.9989	1.58428	2.36808	0.757423	13.894	5.86082	13.1528	7.03437
A7_C1_V7	control	control conditions	E2_C27	204	204	0	0.0334604	0	21.2038	0	2.27746	1.06772	10.9406	7.18046	11.823	5.35872
A7_C1_V7	control	control conditions	E2_C28	216	216	0	0.0409116	0	19.1558	1.87372	2.50703	0.742192	14.4051	6.09012	13.2811	8.17917
A7_C1_V7	control	control conditions	E2_C29	228	228	0	0.0264953	0	18.6128	1.84674	2.36644	0.668434	12.9643	5.94903	11.4019	3.68583
A7_C1_V7	control	control conditions	E2_C30	240	240	0	0.0348688	0	20.0628	1.98345	2.50932	0.737317	13.68	6.20072	12.8467	5.20333
A7_C1_V7	control	control conditions	E2_C31	252	252	0	0.0339768	0	18.3318	1.91896	2.27642	0.599234	12.4471	8.87632	14.4107	3.53378
A7_C1_V8	control	control conditions	E2_C1	0	0	10.997	10.4407	0.752164	2.25027	0.291849	0.610849	1.11423	0.596098	0.0832327	0.0154046	0.0220827
A7_C1_V8	control	control conditions	E2_C3	12	12	1.5186	0.0716343	0.663557	12.1868	2.23235	5.10222	2.45205	5.54958	0.26586	8.31133	4.38173
A7_C1_V8	control	control conditions	E2_C5	24	24	0	0.0984026	0.589204	6.08221	1.04776	4.31991	1.83086	12.6937	0.0411693	8.73643	5.03467
A7_C1_V8	control	control conditions	E2_C7	36	36	0	0.102747	0.0830405	9.07856	2.00276	4.60499	1.51153	9.15673	0	31.8751	0.0358569
A7_C1_V8	control	control conditions	E2_C9	48	48	0	0.0674863	0.0745279	9.8207	4.66127	4.54839	2.47278	9.92648	0	28.771	0.656587
A7_C1_V8	control	control conditions	E2_C11	60	60	0	0.0317331	0.178572	8.09764	4.78804	3.71528	2.10588	9.99522	0.0995481	22.4074	3.62295
A7_C1_V8	control	control conditions	E2_C13	72	72	0	0.0261883	0.0176316	14.8493	3.45763	3.37887	0.922595	12.256	8.19911	18.1984	3.70959
A7_C1_V8	control	control conditions	E2_C15	84	84	0	0.0323615	0.0205799	16.8231	2.24682	2.47867	0.86172	12.5666	4.90268	11.1295	4.64688
A7_C1_V8	control	control conditions	E2_C17	96	96	0	0.024685	0.019725	16.3442	1.85978	2.40051	0.999769	15.5953	5.28049	13.9585	9.96954
A7_C1_V8	control	control conditions	E2_C19	108	108	0	0.0224077	0.0191991	15.4883	1.25894	1.87608	0.900506	14.699	5.53717	15.862	7.91101
A7_C1_V8	control	control conditions	E2_C20	120	120	0	0.0170297	0.0208478	14.705	1.05707	2.16897	1.04684	17.2505	2.47255	7.67098	5.69155
A7_C1_V8	control	control conditions	E2_C21	132	132	0	0.0390116	0.0124032	13.4668	0.793669	1.74665	0.873102	15.9191	4.11586	8.16782	5.87775
A7_C1_V8	control	control conditions	E2_C22	144	144	0	0	0.0151159	14.7602	1.13098	1.92537	0.996504	16.94	2.86444	9.55499	6.33785
A7_C1_V8	control	control conditions	E2_C23	156	156	0	0.0411018	0	14.5001	1.14883	1.81537	0.826187	15.542	3.21977	9.07577	5.58085
A7_C1_V8	control	control conditions	E2_C24	168	168	0	0.0360947	0	15.2307	1.2888	1.94778	0.920746	16.0602	5.34632	9.54448	9.91297
A7_C1_V8	control	control conditions	E2_C25	180	180	0	0.0394521	0	14.6775	1.19661	1.83366	0.806271	15.2872	3.88225	8.12737	5.97383
A7_C1_V8	control	control conditions	E2_C26	192	192	0	0.0466804	0	15.8449	1.5083	2.04819	0.746943	14.2402	3.71578	12.4855	5.94613
A7_C1_V8	control	control conditions	E2_C27	204	204	0	0.0249191	0	23.5349	0	2.409	1.14006	11.1905	6.66885	10.7252	5.84293
A7_C1_V8	control	control conditions	E2_C28	216	216	0	0.0480819	0	18.668	1.85814	2.21795	0.752221	14.3942	3.49264	8.32564	3.25408
A7_C1_V8	control	control conditions	E2_C29	228	228	0	0.0296999	0	18.3623	1.8901	2.00734	0.643916	12.8611	8.49842	12.0192	4.76098
A7_C1_V8	control	control conditions	E2_C30	240	240	0	0.0320342	0	19.7469	1.98074	2.07377	0.706069	13.4589	7.94197	9.53036	4.82852
A7_C1_V8	control	control conditions	E2_C31	252	252	0	0.0254941	0	18.6089	1.89193	1.86772	0.5909	12.184	8.95743	10.5239	6.15768
A7_C1_V9	control	control conditions	E2_C1	0	0	11.2327	10.7854	0.762954	2.25544	0.297963	0.623181	1.14834	0.507559	0.072499	0.0175446	0.0230633
A7_C1_V9	control	control conditions	E2_C3	12	12	1.56999	0.0986008	0.653077	11.851	2.1761	5.00943	2.47003	5.3667	0.355588	11.413	7.32876
A7_C1_V9	control	control conditions	E2_C5	24	24	0	0.0621606	0.60426	6.1123	1.13406	4.41462	1.88526	12.5186	0.067024	16.9939	7.62491
A7_C1_V9	control	control conditions	E2_C7	36	36	0	0.0874778	0.0677798	8.84321	1.99112	4.38097	1.52201	9.45803	0	34.8761	0.0637399
A7_C1_V9	control	control conditions	E2_C9	48	48	0	0.0789854	0.0867979	9.75266	4.59901	4.50949	2.26222	10.2442	0	30.2751	1.7574
A7_C1_V9	control	control conditions	E2_C11	60	60	0	0.0244261	0.0200634	10.3748	4.18709	3.67912	0.796127	10.341	4.96172	15.4857	4.50693
A7_C1_V9	control	control conditions	E2_C13	72	72	0	0.0261416	0.0233229	17.5025	2.64056	3.0513	0.88915	12.7048	10.785	18.5387	5.67004
A7_C1_V9	control	control conditions	E2_C15	84	84	0	0.0264432	0.0193504	14.9498	1.95745	2.50665	0.898911	13.3773	4.53752	17.5052	8.11917
A7_C1_V9	control	control conditions	E2_C17	96	96	0	0.0220974	0.0203583	16.8146	1.55665	2.38893	1.00759	15.7657	6.42467	13.2309	8.89623
A7_C1_V9	control	control conditions	E2_C19	108	108	0	0.0214761	0.015909	14.395	1.28182	2.2299	0.911182	14.7992	3.8478	14.215	9.63031
A7_C1_V9	control	control conditions	E2_C20	120	120	0	0.0177436	0.0166482	14.8762	0.996152	2.43119	1.06831	16.8215	3.37096	13.0109	6.75232
A7_C1_V9	control	control conditions	E2_C21	132	132	0	0.0150584	0.0134595	13.917	1.02099	2.23655	0.924901	15.7266	2.83495	8.47632	4.75029
A7_C1_V9	control	control conditions	E2_C22	144	144	0	0	0.0169043	15.8471	1.13834	2.30505	0.982662	16.3732	2.99595	14.3899	6.02039
A7_C1_V9	control	control conditions	E2_C23	156	156	0	0.0487413	0	15.04	1.55153	2.21626	0.813728	14.5973	2.52665	9.00009	5.07605
A7_C1_V9	control	control conditions	E2_C24	168	168	0	0.0322889	0	16.3326	1.70631	2.76044	0.893081	14.7954	0	0	0
A7_C1_V9	control	control conditions	E2_C25	180	180	0	0.0370264	0	15.477	1.5716	2.58931	0.747336	13.9769	5.28777	15.3674	7.23668
A7_C1_V9	control	control conditions	E2_C26	192	192	0	0.0276552	0	16.741	1.53014	2.64282	0.747301	13.4435	4.13622	13.0908	8.36981
A7_C1_V9	control	control conditions	E2_C27	204	204	0	0.0161149	0	23.7873	0	2.68698	1.12584	11.1825	3.67639	8.51387	3.28074
A7_C1_V9	control	control conditions	E2_C28	216	216	0	0.0345623	0	18.9917	1.78858	2.73225	0.783495	13.8466	6.32873	16.9899	6.2583
A7_C1_V9	control	control conditions	E2_C29	228	228	0	0.0492369	0	18.6619	1.92132	2.45635	0.652637	12.5516	5.5481	16.361	3.58396
A7_C1_V9	control	control conditions	E2_C30	240	240	0	0.0256198	0	20.1834	1.92234	2.58372	0.728587	13.2107	6.56312	11.8907	4.46322
A7_C1_V9	control	control conditions	E2_C31	252	252	0	0.0521613	0	20.1297	1.88306	2.20181	0.590092	11.8751	7.8087	8.37502	6.49543
A7_C1_V10	control	control conditions	E2_C1	0	0	11.0864	10.5757	0.75683	2.34832	0.302001	0.623541	1.13874	0.570143	0.0885801	0.0174631	0.0236947
A7_C1_V10	control	control conditions	E2_C3	12	12	1.92533	0.33249	0.655361	11.6836	2.20672	5.32333	2.57155	4.84411	0.352836	13.0243	5.98157
A7_C1_V10	control	control conditions	E2_C5	24	24	0	0.0585677	0.604679	6.19225	1.1401	4.63068	1.94238	12.6084	0.180462	24.1017	3.01539
A7_C1_V10	control	control conditions	E2_C7	36	36	0	0.111168	0.0797164	8.8739	2.46266	4.58684	1.4729	8.85966	0.00808772	35.1791	0.0492003
A7_C1_V10	control	control conditions	E2_C9	48	48	0	0.0668411	0.077547	10.3237	5.23359	4.78076	2.87617	9.38234	0	28.4251	0.535265
A7_C1_V10	control	control conditions	E2_C11	60	60	0	0.0300073	0.188682	8.33408	5.09944	3.86922	2.36859	10.0564	0	29.7139	5.63898
A7_C1_V10	control	control conditions	E2_C13	72	72	0	0.0229886	0.0432628	8.68728	4.50907	3.74984	1.48609	12.4565	2.76129	19.1237	8.77371
A7_C1_V10	control	control conditions	E2_C15	84	84	0	0.0261908	0.0218088	15.7729	2.58608	2.65734	0.762025	12.2714	12.5294	15.9031	5.03401
A7_C1_V10	control	control conditions	E2_C17	96	96	0	0.0290365	0.0184792	20.1252	1.838	2.38451	0.907313	14.1124	10.0136	10.6712	7.00704
A7_C1_V10	control	control conditions	E2_C19	108	108	0	0.0261263	0.0230285	17.2601	1.24834	2.23004	0.864682	13.7364	7.78986	11.235	11.0118
A7_C1_V10	control	control conditions	E2_C20	120	120	0	0.020555	0.0145401	17.4017	1.18303	2.15198	0.983967	15.711	2.8419	7.04519	3.47479
A7_C1_V10	control	control conditions	E2_C21	132	132	0	0.0174369	0.0190637	13.7189	0.955148	2.37756	0.918458	15.3851	2.94114	9.06971	6.73588
A7_C1_V10	control	control conditions	E2_C22	144	144	0	0	0.0166074	14.3549	1.2458	3.07876	1.02009	16.6425	3.10865	9.64118	7.99297
A7_C1_V10	control	control conditions	E2_C23	156	156	0	0.0480096	0	12.8539	1.14322	2.74476	0.798875	14.8367	2.50824	9.96578	5.68586
A7_C1_V10	control	control conditions	E2_C24	168	168	0	0.0410686	0	15.2303	1.60094	2.90809	0.868161	15.559	2.71125	15.1017	6.45469
A7_C1_V10	control	control conditions	E2_C25	180	180	0	0.030709	0	14.8736	1.72079	2.564	0.744602	14.329	4.10548	15.426	7.78845
A7_C1_V10	control	control conditions	E2_C26	192	192	0	0.0417092	0	16.3166	1.68089	2.56277	0.733296	13.7238	3.92591	9.19303	12.6691
A7_C1_V10	control	control conditions	E2_C27	204	204	0	0.0173518	0	19.9132	0	2.67755	1.04299	11.4359	5.80257	10.7824	8.54098
A7_C1_V10	control	control conditions	E2_C28	216	216	0	0.0385855	0	18.3772	1.8449	2.62296	0.732206	13.8197	7.69013	12.6579	7.34312
A7_C1_V10	control	control conditions	E2_C29	228	228	0	0.0472978	0	18.813	1.89038	2.2929	0.650152	12.7711	9.51408	15.3562	7.17968
A7_C1_V10	control	control conditions	E2_C30	240	240	0	0.05109	0	20.4076	1.98875	2.38196	0.689445	12.9388	7.67923	12.3718	4.41285
A7_C1_V10	control	control conditions	E2_C31	252	252	0	0.0339971	0	19.0719	1.83666	2.15145	0.595902	12.2163	9.5777	14.5333	6.14525
A7_C1_V11	control	control conditions	E2_C1	0	0	10.9647	10.4409	0.743861	2.31063	0.293392	0.614491	1.13662	0.778972	0.092135	0.017968	0.0243387
A7_C1_V11	control	control conditions	E2_C3	12	12	1.93877	0.362363	0.655431	11.7375	2.21206	5.44622	2.58534	4.95855	0.321136	12.1228	6.17582
A7_C1_V11	control	control conditions	E2_C5	24	24	0	0.0557724	0.585016	6.02264	1.09727	4.46511	1.86411	12.425	0.0919798	18.0326	9.12298
A7_C1_V11	control	control conditions	E2_C7	36	36	0	0.106914	0.085259	9.00606	2.41241	4.73347	1.51259	8.84261	0.0163882	39.5786	0.0546273
A7_C1_V11	control	control conditions	E2_C9	48	48	0	0.114334	0.048017	10.36	5.25776	4.7215	3.34267	9.12347	0	27.5801	0.0162778
A7_C1_V11	control	control conditions	E2_C11	60	60	0	0.128628	0.102009	9.21277	6.28677	4.00524	4.5309	8.78889	0	16.3149	0.0091128
A7_C1_V11	control	control conditions	E2_C13	72	72	0	0.0445417	0.0510938	9.45841	7.58316	3.9865	5.13866	10.0678	0.0373227	10.8982	0.0608222
A7_C1_V11	control	control conditions	E2_C15	84	84	0	0.0264024	0.0218114	13.6528	6.17806	3.24375	0.811021	9.92091	9.3108	18.475	3.04054
A7_C1_V11	control	control conditions	E2_C17	96	96	0	0.028173	0.0162359	20.0445	3.95843	2.53282	0.732844	12.4762	8.61745	11.113	4.72391
A7_C1_V11	control	control conditions	E2_C19	108	108	0	0.0241163	0.0255629	16.6592	2.78464	2.16982	0.75396	13.3619	4.88409	13.238	10.5083
A7_C1_V11	control	control conditions	E2_C20	120	120	0	0.0167134	0.0246505	17.8645	2.09056	1.89912	0.805649	15.2589	7.95965	7.95494	7.58443
A7_C1_V11	control	control conditions	E2_C21	132	132	0	0.0165544	0.022763	17.0675	1.4062	1.7636	0.800307	14.6709	7.19971	8.23193	5.97083
A7_C1_V11	control	control conditions	E2_C22	144	144	0	0.0346591	0.0227884	18.3861	1.01101	1.9452	0.924473	16.3045	3.18472	7.96285	7.63027
A7_C1_V11	control	control conditions	E2_C23	156	156	0	0.0250855	0	14.9368	0.877055	1.7885	0.831706	15.3206	3.57399	8.41212	5.15777
A7_C1_V11	control	control conditions	E2_C24	168	168	0	0.026624	0	15.565	0.986564	2.11947	0.928434	16.3222	2.29516	11.8994	10.5464
A7_C1_V11	control	control conditions	E2_C25	180	180	0	0.0339819	0	14.9336	1.13986	2.11893	0.78786	15.0771	3.83526	12.1007	9.29504
A7_C1_V11	control	control conditions	E2_C26	192	192	0	0.037903	0	18.6779	1.5669	2.33464	0.708736	13.8377	5.37536	12.3019	8.04364
A7_C1_V11	control	control conditions	E2_C27	204	204	0	0.0387028	0	26.539	0	1.38832	1.11263	9.99247	4.44896	15.5548	4.79135
A7_C1_V11	control	control conditions	E2_C28	216	216	0	0.0385871	0	19.3391	1.80768	2.47691	0.736816	13.678	6.13489	16.1768	5.16838
A7_C1_V11	control	control conditions	E2_C29	228	228	0	0.0362456	0	19.4426	1.8427	2.31015	0.65556	12.6386	7.87885	13.7003	5.27213
A7_C1_V11	control	control conditions	E2_C30	240	240	0	0.0185496	0	21.2163	1.93235	2.41515	0.666495	12.9381	12.2784	11.8244	5.84946
A7_C1_V11	control	control conditions	E2_C31	252	252	0	0.056213	0	22.0045	2.09348	2.23006	0.570817	11.6749	10.7896	11.2625	4.50617
A7_C1_V12	control	control conditions	E2_C1	0	0	11.7444	11.3565	0.799881	2.51708	0.313788	0.661642	1.21456	0.520954	0.104605	0.0189982	0.0272136
A7_C1_V12	control	control conditions	E2_C3	12	12	2.45535	0.755457	0.671742	11.583	2.48519	5.5118	2.68957	4.63184	0.3755	13.5134	5.7926
A7_C1_V12	control	control conditions	E2_C5	24	24	0	0.0541446	0.637951	6.6376	1.3883	5.07587	2.08504	12.7784	0.0648162	17.7965	8.07616
A7_C1_V12	control	control conditions	E2_C7	36	36	0	0.120511	0.102518	9.18073	2.59271	4.91964	1.56302	9.21499	0	42.0223	0.0698551
A7_C1_V12	control	control conditions	E2_C9	48	48	0	0.0634176	0.0543188	11.5631	5.63163	5.15297	3.17189	9.33781	0	24.7588	0.21754
A7_C1_V12	control	control conditions	E2_C11	60	60	0	0.0543225	0.176427	9.28393	5.49262	4.06525	2.67527	9.46723	0	23.097	4.3428
A7_C1_V12	control	control conditions	E2_C13	72	72	0	0.024985	0.0183011	14.9914	4.84034	4.00808	0.964311	12.1108	6.88782	12.126	6.23909
A7_C1_V12	control	control conditions	E2_C15	84	84	0	0.0285326	0.0268532	20.7134	2.67657	2.59424	0.73026	12.2051	12.1826	9.75525	6.05032
A7_C1_V12	control	control conditions	E2_C17	96	96	0	0.0277073	0.0220625	19.5434	2.05266	2.6479	1.02436	15.0067	5.37511	14.5954	10.6177
A7_C1_V12	control	control conditions	E2_C19	108	108	0	0.0233373	0.0160065	16.0814	1.43208	2.36985	0.852973	14.4162	9.92976	12.8131	11.4914
A7_C1_V12	control	control conditions	E2_C20	120	120	0	0.0222128	0.0303209	21.9331	1.38438	2.22402	0.948616	15.9745	6.69707	7.90898	8.27718
A7_C1_V12	control	control conditions	E2_C21	132	132	0	0.0194234	0.0232997	17.6791	1.16888	2.09395	0.873392	15.211	4.6719	8.86114	5.90892
A7_C1_V12	control	control conditions	E2_C22	144	144	0	0.0296478	0	18.1169	0.913361	2.12167	0.979452	16.8964	4.7364	9.70946	7.08466
A7_C1_V12	control	control conditions	E2_C23	156	156	0	0.0440702	0	10.9149	0.771678	1.67014	0.626351	11.887	3.02597	10.4237	5.07792
A7_C1_V12	control	control conditions	E2_C24	168	168	0	0.0495855	0	24.3096	1.3415	2.64409	0.898286	16.0087	3.81229	12.9465	5.87064
A7_C1_V12	control	control conditions	E2_C25	180	180	0	0.0765958	0	20.8009	1.68232	2.3857	0.696047	14.3603	4.59861	15.4694	6.66337
A7_C1_V12	control	control conditions	E2_C26	192	192	0	0.0292078	0	17.5376	1.54812	2.35452	0.764612	14.1048	6.79649	15.8439	8.72501
A7_C1_V12	control	control conditions	E2_C27	204	204	0	0.0294159	0	21.2144	0	2.39919	1.3357	11.5143	8.24953	11.0674	7.27306
A7_C1_V12	control	control conditions	E2_C28	216	216	0	0.0271242	0	22.5461	1.66901	2.45289	0.766875	14.4061	11.6308	11.4031	5.97219
A7_C1_V12	control	control conditions	E2_C29	228	228	0	0.0436499	0	22.4345	1.86825	2.2928	0.679713	12.5532	15.012	11.7388	4.67132
A7_C1_V12	control	control conditions	E2_C30	240	240	0	0.0367862	0	24.4948	1.83268	2.28704	0.704165	12.2996	13.5461	10.3456	6.66201
A7_C1_V12	control	control conditions	E2_C31	252	252	0	0.0296421	0	22.4793	1.58622	2.06194	0.604375	11.3893	11.015	10.7632	4.08696
A7_C2_V7	control	control conditions	E2_C1	0	0	10.9195	7.91494	0.240036	1.72506	1.78886	0.749124	0	0	0.0412868	0.0374937	0.0269271
A7_C2_V7	control	control conditions	E2_C2	6	6	10.4798	7.5394	0.239808	2.48119	0.976973	0.311411	0.615938	0	0.238388	0.685135	0.305561
A7_C2_V7	control	control conditions	E2_C3	12	12	1.37229	0.0635911	0.229209	10.5528	2.98374	4.29936	1.46899	5.33843	0.350417	11.017	5.30483
A7_C2_V7	control	control conditions	E2_C4	18	18	0	0	0.222965	7.1879	1.96229	3.63911	1.31283	9.37677	0.260116	10.0233	7.21453
A7_C2_V7	control	control conditions	E2_C5	24	24	0	0	0.283576	5.27822	1.64809	3.66204	1.20065	12.4702	0.0589811	14.6174	7.49112
A7_C2_V7	control	control conditions	E2_C6	30	30	0	0.02881	0.200197	6.55416	1.83204	3.86366	0.996093	11.0568	0.0311046	27.2601	0.236741
A7_C2_V7	control	control conditions	E2_C7	36	36	0	0.0229958	0	8.33365	3.12764	3.99562	0.913387	9.08845	0	37.5486	0.0489947
A7_C2_V7	control	control conditions	E2_C8	42	42	0	0.024563	0	8.69101	4.34128	3.55165	1.28664	8.40143	0	31.1555	0.38986
A7_C2_V7	control	control conditions	E2_C9	48	48	0	0	0	9.44213	5.30412	3.61449	1.40261	9.71109	0	25.8911	1.78521
A7_C2_V7	control	control conditions	E2_C10	54	54	0	0	0	8.32951	5.25292	3.17704	1.25587	10.1179	0	28.0011	3.4276
A7_C2_V7	control	control conditions	E2_C11	60	60	0	0	0	8.18477	5.12684	3.03867	1.17382	11.1253	0.0309453	24.3069	5.43296
A7_C2_V7	control	control conditions	E2_C12	66	66	0	0	0	7.14388	4.78828	2.78036	0.852896	11.5924	1.39027	19.285	7.06585
A7_C2_V7	control	control conditions	E2_C13	72	72	0	0	0	10.8492	4.12905	2.76435	0.414392	12.121	10.5181	13.2716	6.40756
A7_C2_V7	control	control conditions	E2_C14	78	78	0	0	0	14.3011	3.13565	2.31105	0.367347	10.9952	15.0288	12.5802	5.96507
A7_C2_V7	control	control conditions	E2_C15	84	84	0	0	0	16.4455	2.46168	2.06029	0.386372	11.4021	16.6281	9.91693	5.42957
A7_C2_V7	control	control conditions	E2_C16	90	90	0	0	0	17.0018	2.12261	1.91782	0.366819	11.3974	9.28366	9.46572	5.3728
A7_C2_V7	control	control conditions	E2_C17	96	96	0	0	0	17.5873	1.70919	1.83029	0.509645	13.2654	5.69489	13.504	8.41771
A7_C2_V7	control	control conditions	E2_C18	102	102	0	0	0	16.9454	1.71307	1.66793	0.497206	12.8581	9.21842	12.5024	9.13224
A7_C2_V7	control	control conditions	E2_C19	108	108	0	0	0	16.8434	1.49726	1.57449	0.477687	12.9653	15.5769	8.41077	12.1985
A7_C2_V7	perturbation	ongoing feed perturbation	E2_P1	114	6	0	0	0	17.3006	1.48585	1.3992	0.435023	16.6322	9.45156	9.59828	8.96544
A7_C2_V7	perturbation	ongoing feed perturbation	E2_P2	120	12	0	0	0	18.5165	1.41946	1.33178	0.492869	16.9299	3.3262	10.7858	5.73234
A7_C2_V7	perturbation	post feed perturbation	E2_P3	126	6	0	0	0	14.6195	3.06089	3.01403	0.468484	10.3894	0.919567	14.842	2.24125
A7_C2_V7	perturbation	post feed perturbation	E2_P4	132	12	0	0	0	13.9582	1.88699	2.86434	1.43878	10.9639	0.943195	23.4132	2.15363
A7_C2_V7	perturbation	post feed perturbation	E2_P5	138	18	0	0	0	13.3321	0	3.09633	0.823199	11.2401	0.261647	21.9422	0.57417
A7_C2_V7	perturbation	post feed perturbation	E2_P6	144	24	0	0	0	13.9899	0	3.15555	0.92042	12.8062	0.126191	33.5431	0.577208
A7_C2_V7	perturbation	post feed perturbation	E2_P7	150	30	0	0	0	13.2808	0	2.96264	0.99895	12.6808	0.151773	35.4284	0.527313
A7_C2_V7	perturbation	post feed perturbation	E2_P8	156	36	0	0	0	13.2881	0	2.82952	1.42051	13.7663	0.164762	36.0981	0.673834
A7_C2_V7	perturbation	post feed perturbation	E2_P9	162	42	0	0	0	12.9586	0	2.68497	1.43464	13.2101	0.308665	34.187	0.675009
A7_C2_V7	perturbation	post feed perturbation	E2_P10	168	48	0	0	0	13.5846	0	2.74826	1.26787	14.8963	0.237106	23.1614	0.407123
A7_C2_V7	perturbation	post feed perturbation	E2_P11	174	54	0	0	0	13.7855	0	2.48669	0.849605	13.3514	0.874681	21.2029	0.369804
A7_C2_V7	perturbation	post feed perturbation	E2_P12	180	60	0	0	0	15.6084	0	2.24605	0.606886	12.3154	3.26734	12.1999	0.533366
A7_C2_V7	perturbation	post feed perturbation	E2_P13	186	66	0	0	0	17.2096	0	1.88214	0.60351	12.3263	6.06216	15.6584	0.795999
A7_C2_V7	perturbation	post feed perturbation	E2_P14	192	72	0	0	0	14.8776	0.210034	0.895226	0.436222	16.0368	9.76245	14.4859	0.695654
A7_C2_V7	perturbation	post feed perturbation	E2_P15	198	78	0	0	0	19.9508	0	1.38866	0.618367	11.4642	8.0851	15.8898	0.372908
A7_C2_V7	perturbation	post feed perturbation	E2_P16	204	84	0	0	0	20.9456	0	1.23281	0.610228	10.8179	7.17482	10.5993	0.510286
A7_C2_V7	perturbation	post feed perturbation	E2_P17	210	90	0	0	0	21.7905	0	1.13291	0.570388	9.85276	9.21122	12.6885	0.574102
A7_C2_V7	perturbation	post feed perturbation	E2_P18	216	96	0	0	0	22.8382	0	1.11008	0.62387	11.9144	7.26429	9.90051	0.476892
A7_C2_V7	perturbation	post feed perturbation	E2_P19	222	102	0	0	0	22.3534	0	1.05845	0.615475	10.763	7.82556	13.3145	0.992043
A7_C2_V7	perturbation	post feed perturbation	E2_P20	228	108	0	0	0	21.0675	0	0.981605	0.646187	10.9459	4.71076	12.6608	0.885945
A7_C2_V7	perturbation	post feed perturbation	E2_P21	234	114	0	0	0	20.7834	0	0.935663	0.623599	9.9961	3.58572	13.5533	0.706547
A7_C2_V7	perturbation	post feed perturbation	E2_P22	240	120	0	0	0	20.7085	0	0.898515	0.68177	12.4572	5.58614	10.6709	0.661091
A7_C2_V7	perturbation	post feed perturbation	E2_P23	246	126	0	0	0	19.7392	0	0.825857	0.692894	11.03	5.89444	8.92501	0.845134
A7_C2_V7	perturbation	post feed perturbation	E2_P24	252	132	0	0	0	20.301	0	0.859612	0.72164	11.0275	7.0762	10.2479	0.715779
A7_C2_V7	perturbation	post feed perturbation	E2_P25	258	138	0	0	0	20.408	0	0.847577	0.672172	10.0408	7.0762	10.2479	0.715779
A7_C2_V8	control	control conditions	E2_C1	0	0	11.1166	7.88978	0.253244	1.7396	1.15794	0.554689	0.566419	0	0.0615468	0.0209816	0.0239879
A7_C2_V8	control	control conditions	E2_C2	6	6	10.5821	7.50756	0.246942	2.51732	0.986168	0.316715	0.625231	0	0.216241	0.671454	0.275396
A7_C2_V8	control	control conditions	E2_C3	12	12	1.43679	0.0883927	0.230469	11.5214	2.98842	4.20797	1.46658	5.16571	0.415923	12.2117	6.19008
A7_C2_V8	control	control conditions	E2_C4	18	18	0	0	0.226839	7.21152	1.8917	3.65518	1.28091	9.18189	0.21796	10.5814	7.83526
A7_C2_V8	control	control conditions	E2_C5	24	24	0	0	0.28385	5.32349	1.68639	3.63553	1.16925	12.1529	0.0811641	17.2144	8.03605
A7_C2_V8	control	control conditions	E2_C6	30	30	0	0.030201	0.181474	6.47677	1.82171	3.81768	1.01016	11.1751	0	31.3591	0.271562
A7_C2_V8	control	control conditions	E2_C7	36	36	0	0.0194359	0	8.13888	3.05504	3.82951	0.944902	9.17868	0	42.2366	0.073725
A7_C2_V8	control	control conditions	E2_C8	42	42	0	0.0179519	0	8.40457	4.19409	3.56916	1.3518	8.55789	0	27.252	0.106203
A7_C2_V8	control	control conditions	E2_C9	48	48	0	0	0	9.34253	5.36869	3.57399	1.55538	9.83103	0	27.4179	0.939856
A7_C2_V8	control	control conditions	E2_C10	54	54	0	0	0	8.90076	5.37675	3.25721	1.4304	9.81183	0.0307152	29.6064	3.73445
A7_C2_V8	control	control conditions	E2_C11	60	60	0	0	0	8.22148	5.2962	2.95491	0.997704	10.7552	1.036	17.0026	3.4856
A7_C2_V8	control	control conditions	E2_C12	66	66	0	0	0	12.8822	4.36659	2.63325	0.254364	10.0401	9.62753	18.3056	4.93355
A7_C2_V8	control	control conditions	E2_C13	72	72	0	0	0	15.2029	3.48115	2.40987	0.326619	10.728	14.3005	16.4546	5.0665
A7_C2_V8	control	control conditions	E2_C14	78	78	0	0	0	17.2622	2.78942	2.0335	0.381395	10.9623	12.6608	14.0154	4.28891
A7_C2_V8	control	control conditions	E2_C15	84	84	0	0	0	17.5408	2.33885	1.86807	0.385774	11.0272	9.75353	13.2871	5.83579
A7_C2_V8	control	control conditions	E2_C16	90	90	0	0	0	17.9275	2.22308	1.74321	0.433042	11.0749	6.82633	12.7575	8.16021
A7_C2_V8	control	control conditions	E2_C17	96	96	0	0	0	17.5387	1.85694	1.62839	0.5246	14.5226	6.67834	14.59	9.46846
A7_C2_V8	control	control conditions	E2_C18	102	102	0	0	0	16.9868	1.6575	1.51178	0.487901	12.8562	9.47772	10.5488	8.4092
A7_C2_V8	control	control conditions	E2_C19	108	108	0	0	0	16.9031	1.36153	1.36923	0.468679	12.8578	10.8152	9.12713	10.4897
A7_C2_V8	perturbation	ongoing feed perturbation	E2_P1	114	6	0	0	0	17.6523	1.4308	1.25565	0.416674	16.95	10.7449	8.37833	8.9644
A7_C2_V8	perturbation	ongoing feed perturbation	E2_P2	120	12	0	0	0	18.6935	1.25784	1.16419	0.487818	17.1184	3.89531	10.867	5.73074
A7_C2_V8	perturbation	ongoing feed perturbation	E2_P3	126	6	0	0	0	15.074	3.12905	2.9077	0.318758	10.4234	1.1234	18.1496	2.3346
A7_C2_V8	perturbation	post feed perturbation	E2_P4	132	12	0	0	0	15.0035	1.59199	2.67849	0.358699	11.7054	1.61124	20.2192	2.56141
A7_C2_V8	perturbation	post feed perturbation	E2_P5	138	18	0	0	0	14.7538	0	3.08137	0.568401	10.0033	0.448056	14.0905	0.952534
A7_C2_V8	perturbation	post feed perturbation	E2_P6	144	24	0	0	0	14.0952	0	2.89934	0.73728	13.6402	0.0973339	12.9987	0.405252
A7_C2_V8	perturbation	post feed perturbation	E2_P7	150	30	0	0	0	13.11	0	2.64568	1.03004	13.3477	0.121159	17.0819	0.744622
A7_C2_V8	perturbation	post feed perturbation	E2_P8	156	36	0	0	0	13.0151	0	2.64474	1.16581	13.7685	0.109331	17.0381	0.559774
A7_C2_V8	perturbation	post feed perturbation	E2_P9	162	42	0	0	0	12.6601	0	2.5153	1.35607	11.5424	0.0432043	11.6241	0.337834
A7_C2_V8	perturbation	post feed perturbation	E2_P10	168	48	0	0	0	13.2954	0	2.58982	1.37113	15.4223	0.826011	22.1854	0.601505
A7_C2_V8	perturbation	post feed perturbation	E2_P11	174	54	0	0	0	13.7282	0	2.45601	0.920318	13.9415	0.736276	19.2221	0.364269
A7_C2_V8	perturbation	post feed perturbation	E2_P12	180	60	0	0	0	15.3559	0	2.22116	0.64399	12.4812	3.80063	18.2456	0.67915
A7_C2_V8	perturbation	post feed perturbation	E2_P13	186	66	0	0	0	16.9316	0	1.86911	0.621409	11.407	3.99494	12.3443	0.325267
A7_C2_V8	perturbation	post feed perturbation	E2_P14	192	72	0	0	0	14.0311	1.11571	1.22647	0.46756	1.84188	7.94927	13.3323	0.398667
A7_C2_V8	perturbation	post feed perturbation	E2_P15	198	78	0	0	0	20.9438	0	1.44621	0.723767	11.8278	8.97445	16.3729	0.334908
A7_C2_V8	perturbation	post feed perturbation	E2_P16	204	84	0	0	0	21.8948	0	1.23652	0.644397	11.9246	7.59964	11.359	0.190142
A7_C2_V8	perturbation	post feed perturbation	E2_P17	210	90	0	0	0	22.8676	0	1.10873	0.595498	9.89364	7.71395	15.9615	0.354767
A7_C2_V8	perturbation	post feed perturbation	E2_P18	216	96	0	0	0	24.1326	0	1.0671	0.644385	12.3211	9.98638	9.03616	0.353054
A7_C2_V8	perturbation	post feed perturbation	E2_P19	222	102	0	0	0	23.0573	0	0.972344	0.637544	10.7183	9.63762	10.0211	0.462538
A7_C2_V8	perturbation	post feed perturbation	E2_P20	228	108	0	0	0	22.8281	0	0.921798	0.607454	11.1087	8.28844	10.3335	0.465097
A7_C2_V8	perturbation	post feed perturbation	E2_P21	234	114	0	0	0	21.9723	0	0.87866	0.594271	9.86708	3.58225	9.7148	0.220481
A7_C2_V8	perturbation	post feed perturbation	E2_P22	240	120	0	0	0	20.4148	0	0.836816	0.698978	13.5672	6.20225	10.8041	0.456862
A7_C2_V8	perturbation	post feed perturbation	E2_P23	246	126	0	0	0	20.3848	0	0.786572	0.670068	10.7138	6.51491	10.5501	0.458268
A7_C2_V8	perturbation	post feed perturbation	E2_P24	252	132	0	0	0	20.3337	0	0.811981	0.703765	11.6356	5.83664	9.04248	0.445765
A7_C2_V8	perturbation	post feed perturbation	E2_P25	258	138	0	0	0	20.8358	0	0.786644	0.706508	9.56691	7.96793	9.85472	0.425115
A7_C2_V9	control	control conditions	E2_C1	0	0	11.0181	7.85425	0.240894	1.71201	0.724954	0.318324	0.550356	0	0.0714916	0.0191386	0.025567
A7_C2_V9	control	control conditions	E2_C2	6	6	10.5865	7.62765	0.243018	2.40802	0.942129	0.315124	0.599766	0	0.230434	0.648161	0.285574
A7_C2_V9	control	control conditions	E2_C3	12	12	2.01648	0.401907	0.229932	9.84421	3.01554	4.17632	1.52214	4.4976	0.465211	13.445	4.9274
A7_C2_V9	control	control conditions	E2_C4	18	18	0	0	0.313359	7.851	1.90531	4.08824	1.52687	9.76938	0.273173	11.7089	7.34645
A7_C2_V9	control	control conditions	E2_C5	24	24	0	0	0.288805	5.20992	1.83548	3.66263	1.20074	13.2953	0.0707219	16.3429	9.07745
A7_C2_V9	control	control conditions	E2_C6	30	30	0	0	0.137077	6.22926	2.05817	3.72233	1.0067	11.2813	0.0389336	31.7387	0.377981
A7_C2_V9	control	control conditions	E2_C7	36	36	0	0.0370765	0	7.96711	3.28877	3.90146	0.883488	9.05924	0.0182022	43.3819	0.0970784
A7_C2_V9	control	control conditions	E2_C8	42	42	0	0.0210061	0	8.65592	4.41052	3.50845	1.17234	8.07518	0	30.0321	0.130647
A7_C2_V9	control	control conditions	E2_C9	48	48	0	0	0	9.79372	5.30151	3.52598	1.39663	8.95174	0.0675587	28.0038	1.51131
A7_C2_V9	control	control conditions	E2_C10	54	54	0	0	0	9.47239	5.63913	3.19372	1.08052	9.48849	1.6181	27.8288	3.3978
A7_C2_V9	control	control conditions	E2_C11	60	60	0	0	0	12.2775	4.56756	2.94104	0.316082	9.72677	8.75308	18.3933	3.56
A7_C2_V9	control	control conditions	E2_C12	66	66	0	0	0	16.9011	3.59795	2.47642	0.27868	9.11104	9.70713	12.1138	3.16114
A7_C2_V9	control	control conditions	E2_C13	72	72	0	0	0	17.1594	2.84569	2.21642	0.380233	10.61	14.7663	12.7832	4.26677
A7_C2_V9	control	control conditions	E2_C14	78	78	0	0	0	18.4261	2.5051	1.9814	0.426405	11.028	8.30109	8.55713	4.32064
A7_C2_V9	control	control conditions	E2_C15	84	84	0	0	0	16.6911	1.948	1.70678	0.4324	11.8014	9.44448	13.0266	9.21197
A7_C2_V9	control	control conditions	E2_C16	90	90	0	0	0	17.4687	1.77718	1.58251	0.420098	11.7162	9.51596	9.84042	7.89485
A7_C2_V9	control	control conditions	E2_C17	96	96	0	0	0	17.602	1.36063	1.51857	0.46245	14.0583	12.2113	11.1171	7.45427
A7_C2_V9	control	control conditions	E2_C18	102	102	0	0	0	17.5305	1.36862	1.33424	0.484186	13.3869	9.78384	9.06282	6.42964
A7_C2_V9	control	control conditions	E2_C19	108	108	0	0	0	16.7864	1.20096	1.17848	0.442885	17.3301	10.027	10.1946	7.75473
A7_C2_V9	perturbation	ongoing feed perturbation	E2_P1	114	6	0	0	0	17.343	1.17428	1.07554	0.400665	16.3218	10.2702	11.3264	9.07982
A7_C2_V9	perturbation	ongoing feed perturbation	E2_P2	120	12	0	0	0	19.1603	1.09259	1.07926	0.418942	17.969	0	17.1787	4.47362
A7_C2_V9	perturbation	ongoing feed perturbation	E2_P3	126	6	0.635567	0	0	16.2063	2.0611	3.11034	0.270486	10.3073	2.21613	16.934	1.40796
A7_C2_V9	perturbation	post feed perturbation	E2_P4	132	12	0	0	0	17.1889	0	3.46743	0.421468	11.3118	3.15194	25.5397	1.29723
A7_C2_V9	perturbation	post feed perturbation	E2_P5	138	18	0	0	0	17.4079	0	3.06602	0.434555	10.0147	2.47427	20.5171	1.20496
A7_C2_V9	perturbation	post feed perturbation	E2_P6	144	24	0	0	0	16.7187	0	2.89874	0.604155	14.2491	0.653875	18.2873	0.495324
A7_C2_V9	perturbation	post feed perturbation	E2_P7	150	30	0	0	0	15.9943	0	2.79422	0.768852	13.4661	0.382412	22.5914	0.459046
A7_C2_V9	perturbation	post feed perturbation	E2_P8	156	36	0	0	0	15.0553	0	2.63438	1.01002	13.4832	0.258095	18.134	0.32375
A7_C2_V9	perturbation	post feed perturbation	E2_P9	162	42	0	0	0	14.7208	0	2.61482	1.2061	10.564	0.14991	14.9853	0.258178
A7_C2_V9	perturbation	post feed perturbation	E2_P10	168	48	0	0	0	14.4661	0	2.53074	1.51501	15.3433	0.345915	24.6209	0.684967
A7_C2_V9	perturbation	post feed perturbation	E2_P11	174	54	0	0	0	14.4467	0	2.38683	1.51012	13.8093	0.990918	22.0554	0.541752
A7_C2_V9	perturbation	post feed perturbation	E2_P12	180	60	0	0	0	15.4557	0	2.31306	0.833273	13.2226	1.99006	17.7545	0.594364
A7_C2_V9	perturbation	post feed perturbation	E2_P13	186	66	0	0	0	17.1183	0	2.08371	0.58317	10.7131	5.29099	18.1137	0.513976
A7_C2_V9	perturbation	post feed perturbation	E2_P14	192	72	0	0	0	14.5052	1.40088	1.66847	0.420524	15.6907	7.76168	17.8946	0.646807
A7_C2_V9	perturbation	post feed perturbation	E2_P15	198	78	0	0	0	20.5436	0	1.60971	0.706518	11.8454	8.00724	14.7475	0.365168
A7_C2_V9	perturbation	post feed perturbation	E2_P16	204	84	0	0	0	21.1281	0	1.36859	0.654718	11.4883	7.27769	15.9139	0.309259
A7_C2_V9	perturbation	post feed perturbation	E2_P17	210	90	0	0	0	22.634	0	1.27288	0.569402	9.67307	5.50563	12.5125	0.153757
A7_C2_V9	perturbation	post feed perturbation	E2_P18	216	96	0	0	0	23.9	0	1.18789	0.626044	12.4561	7.69905	14.9733	0.302463
A7_C2_V9	perturbation	post feed perturbation	E2_P19	222	102	0	0	0	23.7603	0	1.0596	0.590571	10.9312	11.2975	13.3059	0.343794
A7_C2_V9	perturbation	post feed perturbation	E2_P20	228	108	0	0	0	23.6099	0	0.973939	0.615231	11.2428	11.1425	12.0923	0.386383
A7_C2_V9	perturbation	post feed perturbation	E2_P21	234	114	0	0	0	23.7307	0	0.912064	0.590087	9.4306	6.5839	11.0145	0.23215
A7_C2_V9	perturbation	post feed perturbation	E2_P22	240	120	0	0	0	23.9347	0	0.887118	0.616812	12.1659	9.27954	11.5832	0.187465
A7_C2_V9	perturbation	post feed perturbation	E2_P23	246	126	0	0	0	23.8372	0	0.816002	0.696271	10.5962	11.77	11.8032	0.249101
A7_C2_V9	perturbation	post feed perturbation	E2_P24	252	132	0	0	0	23.4986	0	0.829862	0.709629	11.0084	9.49403	10.4313	0.255289
A7_C2_V9	perturbation	post feed perturbation	E2_P25	258	138	0	0	0	21.7204	0	0.741618	0.667203	8.6114	7.21804	9.05935	0.261477
A7_C2_V10	control	control conditions	E2_C1	0	0	11.1444	8.02256	0.248577	1.75931	0.745824	0.33138	0.552388	0	0.0542813	0.0119158	0.0164569
A7_C2_V10	control	control conditions	E2_C2	6	6	10.5757	7.62663	0.245694	2.46854	0.987324	0.312441	0.611083	0	0.24381	0.74642	0.308984
A7_C2_V10	control	control conditions	E2_C3	12	12	1.49832	0.120224	0.232454	10.3306	3.00941	4.38127	1.49236	5.13377	0.316408	12.4862	6.27102
A7_C2_V10	control	control conditions	E2_C4	18	18	0	0	0.316937	9.14936	1.95437	3.78161	1.45047	8.5998	0.174206	10.1717	6.45165
A7_C2_V10	control	control conditions	E2_C5	24	24	0	0	0.293567	7.7329	1.65697	3.51283	1.16271	10.8934	0.0563285	14.2386	7.60017
A7_C2_V10	control	control conditions	E2_C6	30	30	0	0	0.239041	8.2956	2.03242	3.53713	1.01715	10.3042	0	23.639	0
A7_C2_V10	control	control conditions	E2_C7	36	36	0	0.0375015	0	9.52208	2.74097	3.50826	0.892468	8.0448	0	34.5168	0.047316
A7_C2_V10	control	control conditions	E2_C8	42	42	0	0.0211881	0	10.6032	3.78385	3.39064	0.970356	6.58498	0	32.8901	0.165417
A7_C2_V10	control	control conditions	E2_C9	48	48	0	0	0	12.1492	5.02537	3.46314	1.09497	7.40007	0	32.418	0.0975631
A7_C2_V10	control	control conditions	E2_C10	54	54	0	0	0	10.7003	5.55859	3.19401	1.11066	7.64642	0	26.4528	0.332362
A7_C2_V10	control	control conditions	E2_C11	60	60	0	0	0	10.0621	5.81005	2.96039	1.10919	8.27166	0.0921258	24.4348	0.667059
A7_C2_V10	control	control conditions	E2_C12	66	66	0	0	0	12.9959	6.156	2.85717	0	8.1149	4.00453	17.6849	1.60963
A7_C2_V10	control	control conditions	E2_C13	72	72	0	0	0	17.7932	5.29094	2.49251	0.211424	8.07755	6.26928	13.2471	1.73003
A7_C2_V10	control	control conditions	E2_C14	78	78	0	0	0	20.859	4.18979	2.02424	0.187083	8.24892	10.7453	13.0221	3.09021
A7_C2_V10	control	control conditions	E2_C15	84	84	0	0	0	20.2782	3.19854	1.68627	0.199373	9.21378	10.9363	8.85923	4.01591
A7_C2_V10	control	control conditions	E2_C16	90	90	0	0	0	24.1519	2.77403	1.43858	0.231183	8.37895	9.59979	12.2292	6.02098
A7_C2_V10	control	control conditions	E2_C17	96	96	0	0	0	23.6572	2.593	1.52972	0.328382	10.8122	6.79613	9.26065	6.26775
A7_C2_V10	control	control conditions	E2_C18	102	102	0	0	0	23.2411	2.35989	1.34076	0.372689	10.1865	6.43666	10.0123	6.71649
A7_C2_V10	control	control conditions	E2_C19	108	108	0	0	0	22.3215	1.95114	1.13386	0.285972	11.3773	7.88781	10.2838	6.99226
A7_C2_V10	perturbation	ongoing feed perturbation	E2_P1	114	6	0	0	0	24.1031	2.00281	1.11685	0.251536	11.6206	5.48864	8.94755	4.8763
A7_C2_V10	perturbation	ongoing feed perturbation	E2_P2	120	12	0	0	0	25.7257	1.84811	1.12261	0.297011	14.8899	8.48405	5.49948	7.08266
A7_C2_V10	perturbation	ongoing feed perturbation	E2_P3	126	6	0.395227	0	0	21.8592	1.89804	2.88975	0.268079	8.75758	5.55198	10.2364	0.752335
A7_C2_V10	perturbation	post feed perturbation	E2_P4	132	12	0	0	0	23.5522	0	3.02327	0.385036	7.41469	9.13452	18.7946	0.731446
A7_C2_V10	perturbation	post feed perturbation	E2_P5	138	18	0	0	0	24.8401	0	2.53839	0.433949	6.62399	8.4065	15.1887	0.730226
A7_C2_V10	perturbation	post feed perturbation	E2_P6	144	24	0	0	0	24.3721	0	2.2268	0.510987	11.6557	4.96691	18.0183	0.390618
A7_C2_V10	perturbation	post feed perturbation	E2_P7	150	30	0	0	0	21.5808	0	2.09963	0.640799	8.53559	2.05744	13.0563	0.443658
A7_C2_V10	perturbation	post feed perturbation	E2_P8	156	36	0	0	0	20.1428	0	2.10765	0.726025	11.5311	1.17774	15.2314	0.294436
A7_C2_V10	perturbation	post feed perturbation	E2_P9	162	42	0	0	0	18.8913	0	2.12498	0.848921	9.31279	0.689767	15.9544	0.269397
A7_C2_V10	perturbation	post feed perturbation	E2_P10	168	48	0	0	0	17.9713	0	2.19956	0.965334	14.4516	0.589581	20.4686	0.454892
A7_C2_V10	perturbation	post feed perturbation	E2_P11	174	54	0	0	0	16.4368	0	2.14636	1.06941	12.516	0.505185	17.4276	0.577508
A7_C2_V10	perturbation	post feed perturbation	E2_P12	180	60	0	0	0	15.4123	0	2.06361	1.30124	13.1321	0.409898	16.1021	0.637027
A7_C2_V10	perturbation	post feed perturbation	E2_P13	186	66	0	0	0	15.082	0	2.02156	1.11162	11.3257	0.587491	11.8563	0.419113
A7_C2_V10	perturbation	post feed perturbation	E2_P14	192	72	0	0	0	14.0857	1.37415	1.63346	0.393991	15.6146	2.86286	14.8998	0.528694
A7_C2_V10	perturbation	post feed perturbation	E2_P15	198	78	0	0	0	17.0505	0	1.58711	0.660575	13.8435	4.57431	11.7288	0.493508
A7_C2_V10	perturbation	post feed perturbation	E2_P16	204	84	0	0	0	18.4167	0	1.4696	0.635274	13.7779	6.83867	14.2232	0.524228
A7_C2_V10	perturbation	post feed perturbation	E2_P17	210	90	0	0	0	19.1765	0	1.27789	0.565929	10.4911	6.57098	16.3467	0.414155
A7_C2_V10	perturbation	post feed perturbation	E2_P18	216	96	0	0	0	20.2071	0	1.14697	0.648415	12.1889	5.13342	10.5694	0.240195
A7_C2_V10	perturbation	post feed perturbation	E2_P19	222	102	0	0	0	21.4651	0	1.10062	0.613153	11.5246	9.61559	11.4358	0.438928
A7_C2_V10	perturbation	post feed perturbation	E2_P20	228	108	0	0	0	22.0264	0	1.04056	0.613862	11.4039	10.1645	11.0979	0.516356
A7_C2_V10	perturbation	post feed perturbation	E2_P21	234	114	0	0	0	21.5653	0	0.953619	0.621996	9.63125	6.14811	6.79809	0.334488
A7_C2_V10	perturbation	post feed perturbation	E2_P22	240	120	0	0	0	21.2507	0	0.906137	0.659562	11.8394	5.94547	11.364	0.336171
A7_C2_V10	perturbation	post feed perturbation	E2_P23	246	126	0	0	0	21.4716	0	0.921252	0.677411	10.5386	5.80146	14.4904	0.452779
A7_C2_V10	perturbation	post feed perturbation	E2_P24	252	132	0	0	0	21.3675	0	0.909013	0.680016	11.4016	0	19.816	0
A7_C2_V10	perturbation	post feed perturbation	E2_P25	258	138	0	0	0	20.8883	0	0.872056	0.691722	8.80123	0	16.087	0
A7_C2_V11	control	control conditions	E2_C1	0	0	11.2147	8.03399	0.247589	1.80632	0.73992	0.332541	0.565477	0	0.0707299	0.0179838	0.0263743
A7_C2_V11	control	control conditions	E2_C2	6	6	10.5514	7.59741	0.24525	2.48881	0.984866	0.315359	0.614451	0	0.244416	0.706371	0.306309
A7_C2_V11	control	control conditions	E2_C3	12	12	1.53092	0.144181	0.230721	10.173	2.98395	4.37576	1.46035	5.37079	0.475087	15.9249	7.19983
A7_C2_V11	control	control conditions	E2_C4	18	18	0	0	0.314358	7.6869	2.01143	3.88356	1.46153	9.61631	0.196981	11.6404	7.75788
A7_C2_V11	control	control conditions	E2_C5	24	24	0	0	0.286344	5.19897	1.75222	3.65713	1.17791	12.8323	0.0617462	10.725	5.27551
A7_C2_V11	control	control conditions	E2_C6	30	30	0	0	0.202201	6.34677	2.07771	3.71048	1.02697	11.1906	0.0163834	33.9933	0.315835
A7_C2_V11	control	control conditions	E2_C7	36	36	0	0.0290202	0	8.00731	2.93588	3.81333	0.92104	9.52102	0	49.5299	0.105943
A7_C2_V11	control	control conditions	E2_C8	42	42	0	0	0	8.46744	4.25473	3.59441	1.28519	8.68909	0	34.345	0.208636
A7_C2_V11	control	control conditions	E2_C9	48	48	0	0	0	9.48299	5.22014	3.45676	1.39046	9.88592	0	26.7704	1.08878
A7_C2_V11	control	control conditions	E2_C10	54	54	0	0	0	8.36265	5.36885	3.25161	1.3136	10.0528	0	26.038	2.38481
A7_C2_V11	control	control conditions	E2_C11	60	60	0	0	0	8.30794	5.02929	2.99144	1.96453	10.4381	0.137374	20.7151	3.99727
A7_C2_V11	control	control conditions	E2_C12	66	66	0	0	0	8.5147	4.58051	2.90029	2.34799	10.5617	0.434304	18.025	5.24898
A7_C2_V11	control	control conditions	E2_C13	72	72	0	0	0	11.7014	4.00942	2.76447	0.584436	12.0048	2.10864	17.0263	5.99204
A7_C2_V11	control	control conditions	E2_C14	78	78	0	0	0	16.3636	3.13219	2.3967	0.521648	10.0224	7.84577	17.9356	6.72094
A7_C2_V11	control	control conditions	E2_C15	84	84	0	0	0	17.5533	2.68952	2.06261	0.513581	8.85577	10.2028	12.2133	4.15705
A7_C2_V11	control	control conditions	E2_C16	90	90	0	0	0	23.8331	2.37122	1.94531	0.491058	7.76269	21.8549	6.3041	5.63916
A7_C2_V11	control	control conditions	E2_C17	96	96	0	0	0	25.7739	1.97689	1.61887	0.507338	9.41387	18.4082	5.47301	4.29795
A7_C2_V11	control	control conditions	E2_C18	102	102	0	0	0	27.5424	1.53152	1.51556	0.542676	8.06743	23.6445	11.5633	4.65651
A7_C2_V11	control	control conditions	E2_C19	108	108	0	0	0	27.3614	1.37301	1.26921	0.456942	7.69295	20.3399	11.9072	3.37841
A7_C2_V11	perturbation	ongoing feed perturbation	E2_P1	114	6	0	0	0	28.9109	1.45954	1.29327	0.477939	8.09971	19.2239	12.1465	2.41194
A7_C2_V11	perturbation	ongoing feed perturbation	E2_P2	120	12	0	0	0	30.7308	1.4711	1.3376	0.504568	11.2793	16.0731	8.71284	3.95657
A7_C2_V11	perturbation	ongoing feed perturbation	E2_P3	126	6	0	0	0	22.734	6.36433	1.3615	0	7.15651	7.56365	9.60012	0.865593
A7_C2_V11	perturbation	post feed perturbation	E2_P4	132	12	0	0	0	23.3515	1.84069	1.3328	0.488557	6.9885	8.73664	11.7263	0.701627
A7_C2_V11	perturbation	post feed perturbation	E2_P5	138	18	0	0	0	24.284	0	1.45692	0.563493	6.42192	8.61392	10.2562	0.482564
A7_C2_V11	perturbation	post feed perturbation	E2_P6	144	24	0	0	0	24.7963	0	1.3006	0.575555	10.4821	9.13994	9.85608	0.719634
A7_C2_V11	perturbation	post feed perturbation	E2_P7	150	30	0	0	0	24.272	0	1.18777	0.607117	8.25818	7.57785	9.11552	0.499928
A7_C2_V11	perturbation	post feed perturbation	E2_P8	156	36	0	0	0	23.062	0	1.0577	0.624872	8.48976	5.94164	9.46588	0.424403
A7_C2_V11	perturbation	post feed perturbation	E2_P9	162	42	0	0	0	23.2693	0	1.0152	0.643223	7.60009	5.92389	11.2939	0.328091
A7_C2_V11	perturbation	post feed perturbation	E2_P10	168	48	0	0	0	23.0279	0	1.00666	0.673949	14.5288	5.42244	13.0041	0.408365
A7_C2_V11	perturbation	post feed perturbation	E2_P11	174	54	0	0	0	22.1191	0	0.941581	0.675528	11.0593	8.80285	10.8894	0.72929
A7_C2_V11	perturbation	post feed perturbation	E2_P12	180	60	0	0	0	21.7484	0	0.910518	0.648273	11.7534	6.25689	11.8524	0.474007
A7_C2_V11	perturbation	post feed perturbation	E2_P13	186	66	0	0	0	21.9452	0	0.884354	0.641186	9.28868	7.34597	11.6712	0.286207
A7_C2_V11	perturbation	post feed perturbation	E2_P14	192	72	0	0	0	14.276	1.05298	1.51964	0.425946	16.6637	9.50549	9.33488	0.447908
A7_C2_V11	perturbation	post feed perturbation	E2_P15	198	78	0	0	0	23.7409	0	0.867491	0.685726	11.1044	10.66	10.1276	0.591227
A7_C2_V11	perturbation	post feed perturbation	E2_P16	204	84	0	0	0	23.4016	0	0.830262	0.644451	10.991	10.2875	10.559	0.681237
A7_C2_V11	perturbation	post feed perturbation	E2_P17	210	90	0	0	0	23.4191	0	0.807185	0.630695	9.6205	10.2467	12.2541	0.528149
A7_C2_V11	perturbation	post feed perturbation	E2_P18	216	96	0	0	0	23.7593	0	0.817388	0.641235	11.8255	10.2059	13.9491	0.375061
A7_C2_V11	perturbation	post feed perturbation	E2_P19	222	102	0	0	0	23.5945	0	0.805279	0.648668	10.6232	8.42028	12.6438	0.296821
A7_C2_V11	perturbation	post feed perturbation	E2_P20	228	108	0	0	0	23.8161	0	0.785941	0.669871	11.3143	9.12258	8.32222	0.283024
A7_C2_V11	perturbation	post feed perturbation	E2_P21	234	114	0	0	0	23.9291	0	0.769223	0.648442	8.95668	9.21079	8.02088	0.242784
A7_C2_V11	perturbation	post feed perturbation	E2_P22	240	120	0	0	0	23.6915	0	0.750756	0.684109	11.8344	14.3457	8.66493	0.367648
A7_C2_V11	perturbation	post feed perturbation	E2_P23	246	126	0	0	0	22.983	0	0.721079	0.727991	10.07	9.92763	9.62577	0.301762
A7_C2_V11	perturbation	post feed perturbation	E2_P24	252	132	0	0	0	23.1676	0	0.729396	0.752193	9.95855	9.6834	12.581	0.326918
A7_C2_V11	perturbation	post feed perturbation	E2_P25	258	138	0	0	0	23.5419	0	0.741902	0.734248	8.35337	10.2734	10.1079	0.33618
A7_C2_V12	control	control conditions	E2_C1	0	0	0.389783	0.309358	0	10.5077	3.3882	0.102648	2.78776	3.01868	2.8045	0.373933	0.810189
A7_C2_V12	control	control conditions	E2_C2	6	6	0.726509	0	0	14.922	3.55808	0.192397	4.39828	8.68567	1.91724	0.383448	1.19828
A7_C2_V12	control	control conditions	E2_C3	12	12	0.90653	0.0337196	0	12.1201	0.0992981	0.792392	3.69555	10.8332	1.57663	0.693717	0.762038
A7_C2_V12	control	control conditions	E2_C4	18	18	0.927981	0.0140596	0	13.6194	0	1.75147	3.32248	10.7792	0.114141	7.97973	0.0359333
A7_C2_V12	control	control conditions	E2_C5	24	24	0.38315	0.0348405	0	14.867	0	2.41883	3.64646	11.7724	0.0738897	17.4587	0.0320189
A7_C2_V12	control	control conditions	E2_C6	30	30	0	0	0	17.0416	0	2.66042	3.82205	11.6405	0	18.1741	0.464251
A7_C2_V12	control	control conditions	E2_C7	36	36	0	0	0	14.1892	0	2.60452	3.6325	11.5484	0	15.3375	0.193968
A7_C2_V12	control	control conditions	E2_C8	42	42	0	0	0	15.5096	0	2.71281	3.67512	11.3145	0	17.9698	0.295306
A7_C2_V12	control	control conditions	E2_C9	48	48	0	0	0	15.7218	0	2.95071	3.89023	12.5909	0.127853	18.7871	0.264839
A7_C2_V12	control	control conditions	E2_C10	54	54	0	0	0	16.5972	0	2.92236	3.48973	12.3932	0.438323	19.7951	0.527259
A7_C2_V12	control	control conditions	E2_C11	60	60	0	0	0	16.2543	0	2.76397	2.01087	11.6457	2.25818	18.606	1.06887
A7_C2_V12	control	control conditions	E2_C12	66	66	0	0	0	18.7369	0	2.68262	0.968866	10.7334	3.19529	16.5906	0.801557
A7_C2_V12	control	control conditions	E2_C13	72	72	0	0	0	20.008	0	2.48592	1.04933	12.709	2.35533	15.8396	0.508142
A7_C2_V12	control	control conditions	E2_C14	78	78	0	0	0	22.085	0	2.22287	1.04691	11.0985	3.11055	14.0226	0.852156
A7_C2_V12	control	control conditions	E2_C15	84	84	0	0	0	22.6882	0	1.99268	0.999514	12.7212	2.56242	12.3577	0.47856
A7_C2_V12	control	control conditions	E2_C16	90	90	0	0	0	24.7314	0	1.87456	0.931775	11.0706	6.61785	15.665	1.02095
A7_C2_V12	control	control conditions	E2_C17	96	96	0	0	0	24.8974	0	1.72537	1.03305	12.6255	6.92817	14.0971	1.495
A7_C2_V12	control	control conditions	E2_C18	102	102	0	0	0	25.3375	0	1.54648	0.997232	10.7037	7.89804	13.6548	0.89916
A7_C2_V12	control	control conditions	E2_C19	108	108	0	0	0	23.438	0	1.29579	0.819524	14.1247	8.86791	13.2125	0.303318
A7_C2_V12	perturbation	ongoing feed perturbation	E2_P1	114	6	0	0	0	25.7473	0	1.24868	0.781813	8.64069	8.00636	13.6246	0.151882
A7_C2_V12	perturbation	ongoing feed perturbation	E2_P2	120	12	0	0	0	28.8783	0	1.20485	0.7962	14.6403	7.84095	11.029	0.113637
A7_C2_V12	perturbation	ongoing feed perturbation	E2_P3	126	6	0	0	0	20.6805	5.00233	1.71234	0.318717	8.9467	5.59811	11.7965	0.010422
A7_C2_V12	perturbation	post feed perturbation	E2_P4	132	12	0	0	0	22.2757	1.02531	1.40926	0.600807	8.45883	6.02426	14.4957	0.0136867
A7_C2_V12	perturbation	post feed perturbation	E2_P5	138	18	0	0	0	25.0256	0	1.80824	0.578226	6.8867	7.12872	15.0719	0.00887676
A7_C2_V12	perturbation	post feed perturbation	E2_P6	144	24	0	0	0	26.8762	0	1.53656	0.661053	11.4329	6.70027	12.1278	0.0540508
A7_C2_V12	perturbation	post feed perturbation	E2_P7	150	30	0	0	0	26.1136	0	1.39939	0.740074	11.1274	2.26729	16.0131	0.0582758
A7_C2_V12	perturbation	post feed perturbation	E2_P8	156	36	0	0	0	22.0102	0	1.41181	0.929319	13.3782	0.582964	16.388	0.113977
A7_C2_V12	perturbation	post feed perturbation	E2_P9	162	42	0	0	0	19.9334	0	1.51516	1.31133	9.97736	0.257921	15.6761	0.11284
A7_C2_V12	perturbation	post feed perturbation	E2_P10	168	48	0	0	0	18.8139	0	1.71139	1.48237	15.364	0.167319	20.4836	0.166685
A7_C2_V12	perturbation	post feed perturbation	E2_P11	174	54	0	0	0	17.9364	0	1.76953	1.78662	12.5002	0.286207	19.7963	0.469318
A7_C2_V12	perturbation	post feed perturbation	E2_P12	180	60	0	0	0	16.3903	0	1.78852	1.89592	13.2303	0.605652	20.0803	0.462379
A7_C2_V12	perturbation	post feed perturbation	E2_P13	186	66	0	0	0	17.3577	0	1.78914	1.5642	10.6901	0.956317	18.8611	0.272764
A7_C2_V12	perturbation	post feed perturbation	E2_P14	192	72	0	0	0	15.3474	1.27302	1.47681	0.476661	16.4825	4.13161	19.913	0.290875
A7_C2_V12	perturbation	post feed perturbation	E2_P15	198	78	0	0	0	19.6748	0	1.48873	0.832168	11.8496	6.39358	15.8493	0.264447
A7_C2_V12	perturbation	post feed perturbation	E2_P16	204	84	0	0	0	20.0229	0	1.27304	0.744335	1.29382	7.36748	14.6221	0.220059
A7_C2_V12	perturbation	post feed perturbation	E2_P17	210	90	0	0	0	21.6231	0	1.1833	0.692463	9.64778	9.86644	12.7425	0.189057
A7_C2_V12	perturbation	post feed perturbation	E2_P18	216	96	0	0	0	23.3305	0	1.12838	0.749076	11.9909	12.3654	10.863	0.158054
A7_C2_V12	perturbation	post feed perturbation	E2_P19	222	102	0	0	0	24.0462	0	1.03383	0.701988	10.9592	10.1379	15.6418	0.110011
A7_C2_V12	perturbation	post feed perturbation	E2_P20	228	108	0	0	0	23.8526	0	0.944807	0.69031	10.7064	10.7044	13.0545	0.193274
A7_C2_V12	perturbation	post feed perturbation	E2_P21	234	114	0	0	0	23.6894	0	0.888962	0.683731	8.79422	7.72947	8.83648	0.179603
A7_C2_V12	perturbation	post feed perturbation	E2_P22	240	120	0	0	0	24.9464	0	0.914748	0.747511	11.1593	12.384	12.795	0.22713
A7_C2_V12	perturbation	post feed perturbation	E2_P23	246	126	0	0	0	24.6565	0	0.848515	0.766458	9.88592	9.39731	14.7092	0.176858
A7_C2_V12	perturbation	post feed perturbation	E2_P24	252	132	0	0	0	24.6096	0	0.846434	0.767153	10.1821	10.0218	14.0616	0.0639789
A7_C2_V12	perturbation	post feed perturbation	E2_P25	258	138	0	0	0	24.5939	0	0.808354	0.743589	7.62532	10.0218	14.0616	0.0639789
A8_C2_V2	control	control conditions	E3_C1	0	0	11.3526	9.35398	0.621863	3.11324	0.400417	0.400417	1.24348	0.0685049	0.183786	0.30014	0.160073
A8_C2_V2	control	control conditions	E3_C2	10	10	0.512993	0.461717	0.52404	13.5711	0.385458	0.385458	1.64443	2.35671	1.22083	33.825	7.20175
A8_C2_V2	control	control conditions	E3_C3	22	22	0.166807	0.0380945	0.108467	7.16356	0.370198	0.370198	1.07721	9.80259	0.449605	11.7657	4.30622
A8_C2_V2	control	control conditions	E3_C4	52	52	0.166637	0.0311966	0.107814	6.98613	0.223961	0.223961	1.3434	13.6562	0.28263	7.98124	2.97953
A8_C2_V2	control	control conditions	E3_C5	94	94	0.178999	0.0923456	0.132653	5.66151	0.149809	0.149809	1.41727	15.33	0.115655	4.1968	1.65284
A8_C2_V2	control	control conditions	E3_C6	124	124	0.172755	0.0879453	0.657248	3.5721	0.145915	0.145915	1.29244	14.5219	0.069554	5.98247	2.89477
A8_C2_V2	control	control conditions	E3_C7	190	190	0.159288	0.0852842	0.67584	8.91398	0.147834	0.147834	1.37028	17.2916	0.692391	4.81217	2.38464
A8_C2_V2	control	control conditions	E3_C8	250	250	0.127559	0.0358668	0.553004	7.45956	0.153923	0.153923	1.94511	17.1796	0.584499	4.44581	2.27989
A8_C2_V2	control	control conditions	E3_C9	400	400	0.0949233	0.0319389	0.635462	8.33507	0.12913	0.12913	1.05459	14.6418	1.06425	7.02296	1.4
A8_C2_V9	control	control conditions	E3_C1	0	0	11.8813	9.8349	0.647979	3.14138	0.418012	0.899582	1.32024	0.0891652	0.380044	0.582185	0.279271
A8_C2_V9	control	control conditions	E3_C2	10	10	0.154566	0.0741164	0.548311	13.3949	0.232353	4.18803	1.26575	3.96777	1.32107	23.3453	8.92762
A8_C2_V9	control	control conditions	E3_C3	22	22	0.165184	0.0833836	0.574158	6.2519	0.265388	3.21915	1.08217	11.7251	0.550457	7.92126	3.21748
A8_C2_V9	control	control conditions	E3_C4	52	52	0.163323	0.0876904	0.634361	7.92769	0.212836	2.11692	1.18714	12.5705	0.31873	5.83699	3.15018
A8_C2_V9	control	control conditions	E3_C5	94	94	0.179647	0.0878484	0.55724	7.27807	0.192103	1.64296	1.82239	14.7089	0.129995	2.34847	2.55304
A8_C2_V9	control	control conditions	E3_C6	124	124	0.172849	0.0842667	0.579287	7.23701	0.227575	1.29812	1.29033	14.3488	0.17476	1.36329	3.08795
A8_C2_V9	control	control conditions	E3_C7	190	190	0.16323	0.0881394	0.609718	7.12304	0.168656	1.15438	1.40382	15.7106	0.406116	6.08296	1.34213
A8_C2_V9	control	control conditions	E3_C8	250	250	0.137708	0.0834849	0.539454	7.16892	0.232587	1.02689	1.26983	15.0569	0.799566	2.70024	2.77719
A8_C2_V9	control	control conditions	E3_C9	400	400	0.122409	0.0407823	0.563605	9.86819	0.188908	0.992839	1.1597	14.0607	0.146711	1.56501	2.49038
A8_C1_V2	control	control conditions	E3_C3	22	22	0.174777	0.0878609	0.705157	6.43082	0.320749	3.48803	1.15631	12.449	0.00999204	0.474154	0.437854
A8_C1_V2	control	control conditions	E3_C4	52	52	0.166157	0.0345458	0.672462	7.83304	0.192742	2.26971	1.23926	14.1494	0.140855	4.8808	2.79254
A8_C1_V2	control	control conditions	E3_C5	94	94	0.191108	0.102198	0.681622	8.61131	0.164245	1.65466	1.45937	15.4005	0.082504	3.45509	1.67361
A8_C1_V2	perturbation	ongoing pH perturbation	E3_P1	106	9	0.159507	0.0342285	0.71662	4.89064	0.160951	1.29875	0.995584	13.7721	0.262535	6.26524	3.16822
A8_C1_V2	perturbation	ongoing pH perturbation	E3_P2	118	21	2.35021	1.70837	0.702131	4.26248	0.245575	1.34766	1.08365	10.9274	0.0202049	2.49337	0.618623
A8_C1_V2	perturbation	post pH perturbation	E3_P3	124	6	4.06506	3.05433	0.441793	3.6042	0.274851	1.26198	1.06876	8.6156	0.0307014	2.38014	0.447961
A8_C1_V2	perturbation	post pH perturbation	E3_P4	142	24	7.92551	6.0857	0.43798	3.3252	0.356163	1.22072	1.19623	4.19304	0	1.497	0
A8_C1_V2	perturbation	post pH perturbation	E3_P5	160	42	8.87265	6.89111	0.421805	2.49672	0.360093	1.04702	1.15355	2.48061	0.00573517	0.803882	0.0393827
A8_C1_V2	perturbation	post pH perturbation	E3_P6	190	72	0.856202	1.36711	0.456377	11.4396	1.53198	7.39692	1.73504	0.432314	0.00812884	1.94563	0.00123999
A8_C1_V2	perturbation	post pH perturbation	E3_P7	250	132	2.56367	1.84904	0.367156	9.39332	1.21576	7.38128	1.52553	0.0491368	0.00910689	2.04291	0.000482941
A8_C1_V2	perturbation	ongoing feed perturbation	E3_P8	262	9	0.227892	0.408034	0.446801	12.575	1.40095	10.4551	1.53136	0.0299713	0.0055124	2.07117	0.000521678
A8_C1_V2	perturbation	post pH/feed perturbation	E3_P9	268	4	4.3809	3.39281	0.4654	8.40586	0.727785	6.37376	1.56765	0.0254284	0.00338449	0.859445	0.000170647
A8_C1_V2	perturbation	post pH/feed perturbation	E3_P10	292	28	0.815276	0.86082	0.388001	8.56588	1.39404	5.90233	1.61837	2.81029	0.0103437	1.54861	0.535344
A8_C1_V2	perturbation	post pH/feed perturbation	E3_P11	304	40	0.154391	0.0828418	0.47092	3.45965	1.0603	4.53412	1.60888	9.08139	0.0113811	1.71287	0.794653
A8_C1_V2	perturbation	post pH/feed perturbation	E3_P12	328	64	0.121372	0.0773876	0.490496	2.87777	0.512239	3.29597	1.28691	11.851	0.0123026	2.56175	1.04795
A8_C1_V2	perturbation	post pH/feed perturbation	E3_P13	358	94	0.181355	0.118482	0.404595	5.87452	0.344468	4.99819	1.79409	19.4711	0.0317857	5.21205	1.84126
A8_C1_V2	perturbation	post pH/feed perturbation	E3_P14	400	136	0.112762	0.0332385	0.464149	3.16905	0.127607	2.94836	1.08584	13.0663	0.0281096	4.65164	1.68055
A8_C1_V6	control	control conditions	E3_C1	0	0	11.6427	9.68818	0.123867	3.19889	0.412891	0.89286	1.2848	11.1878	0.282367	0.452397	0.228237
A8_C1_V6	control	control conditions	E3_C2	10	10	0.20123	0.0918581	0.107936	17.585	0.302352	5.21351	1.48147	7.6913	1.2691	20.1559	6.13581
A8_C1_V6	control	control conditions	E3_C3	22	22	0.170301	0.0384778	0.125437	6.63741	0.274433	3.24034	1.13234	11.2045	0.360842	6.06739	2.50677
A8_C1_V6	control	control conditions	E3_C4	52	52	0.136392	0.0880999	0.128657	12.1478	0.185024	2.53025	1.12896	11.089	0.223465	3.49392	2.75091
A8_C1_V6	control	control conditions	E3_C5	94	94	0.188465	0.0404234	0.116001	6.53559	0.283593	1.63506	2.08691	10.2564	0.114791	0.519988	2.30582
A8_C1_V6	perturbation	ongoing pH perturbation	E3_P1	106	9	0.290443	0.135052	0.120041	6.17026	0.292267	1.26577	1.15934	11.3945	0.215311	0.506375	2.76831
A8_C1_V6	perturbation	ongoing pH perturbation	E3_P2	118	21	1.63813	1.00593	0.127767	3.79374	0.262698	1.4334	1.09775	13.1425	0.0762218	0.381629	0.971149
A8_C1_V6	perturbation	post pH perturbation	E3_P3	124	6	5.33767	4.03743	0.12242	4.16747	0.334465	1.02643	1.10974	12.687	0.00920483	1.12343	0.337363
A8_C1_V6	perturbation	post pH perturbation	E3_P4	142	24	8.68312	6.68681	0.255518	3.36827	0.37683	0.966209	1.23118	13.4146	0.0466318	0.2882	0.396168
A8_C1_V6	perturbation	post pH perturbation	E3_P5	160	42	9.57552	7.53842	0.277498	2.50175	0.363887	0.830874	1.16335	12.8657	0.00992642	0.246308	0.142765
A8_C1_V6	perturbation	post pH perturbation	E3_P6	190	72	8.00103	5.60822	0.11677	6.75201	0.422242	3.65863	2.43106	12.6599	0.0110798	2.41846	0.000859642
A8_C1_V6	perturbation	post pH perturbation	E3_P7	250	132	7.7242	6.63601	0.278473	4.97247	0.548675	3.10857	1.30966	13.3106	0.00267063	0.76161	0.000719631
A8_C1_V6	perturbation	ongoing feed perturbation	E3_P8	262	9	3.41202	2.49401	0.169989	10.0476	0.945769	7.2941	2.03839	11.9764	0.00838037	2.34896	0.00066016
A8_C1_V6	perturbation	post pH/feed perturbation	E3_P9	268	4	6.29945	4.54019	0.119617	6.94906	0.694941	4.76499	1.70498	10.9713	0.00304072	1.03619	0.000769339
A8_C1_V6	perturbation	post pH/feed perturbation	E3_P10	292	28	6.69346	5.62253	0.364764	6.01034	0.559076	4.06789	1.40421	12.4137	0.000800669	0.170701	0.000498645
A8_C1_V6	perturbation	post pH/feed perturbation	E3_P11	304	40	7.45598	6.15874	0.335594	4.92215	0.454168	3.21488	1.29281	8.69498	0.00104588	0.436891	0.000163298
A8_C1_V6	perturbation	post pH/feed perturbation	E3_P12	328	64	4.12511	4.02903	0.457594	8.16749	0.520206	5.87055	1.94821	9.09912	0.00316631	1.11778	5.84549e-05
A8_C1_V6	perturbation	post pH/feed perturbation	E3_P13	358	94	5.47125	5.31744	0.453373	10.089	0.856627	7.01261	2.04632	8.97423	0.00509269	2.04901	0
A8_C1_V6	perturbation	post pH/feed perturbation	E3_P14	400	136	4.68791	4.00623	0.382591	7.69659	0.924744	5.99915	1.59532	6.85748	0.00428336	1.10345	0.0082628
A8_C1_V8	control	control conditions	E3_C1	0	0	11.1886	9.26518	0.352784	2.99687	0.395254	0.853587	1.22439	0.0808307	0.189653	0.287039	0.126809
A8_C1_V8	control	control conditions	E3_C2	10	10	0.182792	0.0799343	0.478367	13.434	0.277419	4.72656	1.46888	2.95088	1.19787	30.817	8.38866
A8_C1_V8	control	control conditions	E3_C3	22	22	0.167361	0.0412098	0.322282	6.25318	0.325895	3.41471	1.13228	11.2188	0.29222	9.2028	3.30798
A8_C1_V8	control	control conditions	E3_C4	52	52	0.165935	0.0330298	0.104708	7.33097	0.193359	2.30837	1.16044	13.5221	1.22352	11.2607	5.58224
A8_C1_V8	control	control conditions	E3_C5	94	94	0.187943	0.0964445	0.413197	6.21016	0.153201	1.82479	1.37967	15.7492	0.0979371	3.24938	1.68238
A8_C1_V8	perturbation	ongoing pH perturbation	E3_P1	106	9	0.162823	0.0963162	0	3.78445	0.1392	1.45047	1.11487	13.9712	0.0367597	4.45535	2.33949
A8_C1_V8	perturbation	ongoing pH perturbation	E3_P2	118	21	1.65254	0.991024	0.535007	3.67011	0.264547	1.41124	1.10378	11.2243	0.0128585	1.49685	0.528491
A8_C1_V8	perturbation	post pH perturbation	E3_P3	124	6	3.51202	2.3587	0.515882	3.26572	0.387561	1.42562	1.11971	8.88091	0.00876179	1.52841	0.218826
A8_C1_V8	perturbation	post pH perturbation	E3_P4	142	24	7.3723	5.29157	0.579284	3.11732	0.651064	1.42487	1.21426	4.98401	0.0040197	0.694646	0.0823345
A8_C1_V8	perturbation	post pH perturbation	E3_P5	160	42	7.89627	5.65512	0.550952	3.88775	0.597942	2.11769	1.44258	2.40871	0.00743059	1.7072	0.0223717
A8_C1_V8	perturbation	post pH perturbation	E3_P6	190	72	1.66954	2.0268	0.561806	9.48346	0.700332	6.61612	1.26423	1.67072	0.00503561	1.37176	0.196209
A8_C1_V8	perturbation	post pH perturbation	E3_P7	250	132	0.11731	0.0787037	0.590014	3.49733	0.283125	2.82212	1.06119	12.185	0.0459478	4.41877	2.62128
A8_C1_V8	perturbation	ongoing feed perturbation	E3_P8	262	9	0.125007	0.0866741	0.652438	4.01676	0.285895	3.22983	1.16256	13.0442	0.0503911	4.27981	3.284
A8_C1_V8	perturbation	post pH/feed perturbation	E3_P9	268	4	3.78619	1.03403	0.656576	6.83697	0.559167	5.1307	1.52537	5.30904	0.0436855	5.71004	1.65757
A8_C1_V8	perturbation	post pH/feed perturbation	E3_P10	292	28	0.424012	0.293283	0.606851	9.307	0.390676	7.59066	1.18593	4.34767	0.0453304	5.16384	1.66603
A8_C1_V8	perturbation	post pH/feed perturbation	E3_P11	304	40	0.218296	0.246529	0.113319	7.51545	0.300768	6.44166	1.08854	6.64591	0.0361363	5.05677	1.97909
A8_C1_V8	perturbation	post pH/feed perturbation	E3_P12	328	64	0.581114	0.101128	0.115934	6.36907	0.321289	4.52209	1.34052	9.20932	0.0168436	2.42724	1.09491
A8_C1_V8	perturbation	post pH/feed perturbation	E3_P13	358	94	0.457602	0.131749	0.121889	10.3187	0.491368	5.89444	1.57823	9.78104	0.0192741	2.53809	1.26714
A8_C1_V8	perturbation	post pH/feed perturbation	E3_P14	400	136	0.111607	0.106755	0.622642	3.70374	0.488692	4.35503	1.48786	11.7426	0.0227725	3.76733	1.52679

## Sheet: ambrSS
Vessel	Condition	Description	Label	Time (h)	Time in condition (h)	Pyruvate (mM)	Glucose (mM)	Trehalose (mM)	Acetate (mM)	Lactate (mM)	Succinate (mM)	Formate (mM)	Butyrate (mM)	Blautia hydrogenotrophica (10^5 cells/uL)	Bacteroides thetaiotaomicron (10^5 cells/uL)	Roseburia intestinalis (10^5 cells/uL)
A7_C1_V1	control	control conditions	E2_C31	252	252	0	0.0325139	0	20.9024	2.05145	2.43691	0.673566	12.4748	8.17833	11.2501	9.67769
A7_C1_V2	control	control conditions	E2_C31	252	252	0	0.0289588	0	19.8705	2.22303	1.766	0.635295	13.1663	9.21163	9.86197	5.95688
A7_C1_V3	control	control conditions	E2_C31	252	252	0	0.0227186	0	20.4285	2.20705	1.83147	0.613391	12.2127	10.5238	8.66285	5.01433
A7_C1_V4	control	control conditions	E2_C31	252	252	0	0.0346732	0	21.5188	2.37447	2.45983	0.553995	11.9915	10.0465	10.1843	3.1366
A7_C1_V5	control	control conditions	E2_C31	252	252	0	0.0344329	0	19.5757	1.9532	2.08879	0.640909	12.0336	11.1284	9.54563	3.45748
A7_C1_V6	control	control conditions	E2_C31	252	252	0	0.0248467	0	13.8787	1.04573	1.05038	0.722394	14.8915	6.94661	4.93159	4.97764
A7_C1_V7	control	control conditions	E2_C31	252	252	0	0.0339768	0	18.3318	1.91896	2.27642	0.599234	12.4471	8.87632	14.4107	3.53378
A7_C1_V8	control	control conditions	E2_C31	252	252	0	0.0254941	0	18.6089	1.89193	1.86772	0.5909	12.184	8.95743	10.5239	6.15768
A7_C1_V9	control	control conditions	E2_C31	252	252	0	0.0521613	0	20.1297	1.88306	2.20181	0.590092	11.8751	7.8087	8.37502	6.49543
A7_C1_V10	control	control conditions	E2_C31	252	252	0	0.0339971	0	19.0719	1.83666	2.15145	0.595902	12.2163	9.5777	14.5333	6.14525
A7_C1_V11	control	control conditions	E2_C31	252	252	0	0.056213	0	22.0045	2.09348	2.23006	0.570817	11.6749	10.7896	11.2625	4.50617
A7_C1_V12	control	control conditions	E2_C31	252	252	0	0.0296421	0	22.4793	1.58622	2.06194	0.604375	11.3893	11.015	10.7632	4.08696
A8_C2_V2	control	control conditions	E3_C9	400	400	0.0949233	0.0319389	0.635462	8.33507	0.12913	0.12913	1.05459	14.6418	1.06425	7.02296	1.4
A8_C2_V9	control	control conditions	E3_C9	400	400	0.122409	0.0407823	0.563605	9.86819	0.188908	0.992839	1.1597	14.0607	0.146711	1.56501	2.49038
A6_C2_V7	perturbation	post pH/feed perturbation	E1_P27	308	158	2.26044	0.998809	0.51126	11.2248	3.71078	9.39286	1.65229	0.0662137	0	7.02877	0.00142772
A6_C2_V8	perturbation	post pH/feed perturbation	E1_P27	308	158	1.27527	0.560434	0.501442	11.8436	5.25233	9.86072	1.63667	0.248798	0	7.92481	0.00170246
A6_C2_V9	perturbation	post pH/feed perturbation	E1_P27	308	158	1.41735	0.559476	0.504937	12	4.74672	10.1744	1.7841	0.163478	0	7.49386	0.00164802
A6_C2_V10	perturbation	post pH/feed perturbation	E1_P27	308	158	0	0.03578	0	24.1874	0.945681	2.66669	1.07652	12.2572	10.6882	11.3047	1.42586
A6_C2_V11	perturbation	post pH/feed perturbation	E1_P27	308	158	0.688872	0.302411	0.481504	12.194	4.63478	10.5273	1.6298	0.208184	0	8.3603	0.0012775
A6_C2_V12	perturbation	post pH/feed perturbation	E1_P27	308	158	0	0.0240394	0.38752	4.34308	2.48581	5.44188	1.41469	12.1705	0	14.2379	3.48154
A8_C1_V2	perturbation	post pH/feed perturbation	E3_P14	400	136	0.112762	0.0332385	0.464149	3.16905	0.127607	2.94836	1.08584	13.0663	0.0281096	4.65164	1.68055
A8_C1_V6	perturbation	post pH/feed perturbation	E3_P14	400	136	4.68791	4.00623	0.382591	7.69659	0.924744	5.99915	1.59532	6.85748	0.00428336	1.10345	0.0082628
A8_C1_V8	perturbation	post pH/feed perturbation	E3_P14	400	136	0.111607	0.106755	0.622642	3.70374	0.488692	4.35503	1.48786	11.7426	0.0227725	3.76733	1.52679
A7_C2_V7	perturbation	post feed perturbation	E2_P25	258	138	0	0	0	20.408	0	0.847577	0.672172	10.0408	7.0762	10.2479	0.715779
A7_C2_V8	perturbation	post feed perturbation	E2_P25	258	138	0	0	0	20.8358	0	0.786644	0.706508	9.56691	7.96793	9.85472	0.425115
A7_C2_V9	perturbation	post feed perturbation	E2_P25	258	138	0	0	0	21.7204	0	0.741618	0.667203	8.6114	7.21804	9.05935	0.261477
A7_C2_V10	perturbation	post feed perturbation	E2_P25	258	138	0	0	0	20.8883	0	0.872056	0.691722	8.80123	0	16.087	0
A7_C2_V11	perturbation	post feed perturbation	E2_P25	258	138	0	0	0	23.5419	0	0.741902	0.734248	8.35337	10.2734	10.1079	0.33618
A7_C2_V12	perturbation	post feed perturbation	E2_P25	258	138	0	0	0	24.5939	0	0.808354	0.743589	7.62532	10.0218	14.0616	0.0639789
